# Supplementary material for: Rapid SARS-CoV-2 Intra-Host and Within-Household Emergence of Novel Haplotypes
Source: MDPI journal article supplement (doi:10.3390/v14020399), 2022-02-15
Supplement: s1 [file s1]

We gratefully acknowledge the following Authors from the Originating laboratories responsible for obtaining the specimens, as well as the Submitting laboratories where the genome data were generated and shared via GISAID, on which this research is based.

All Submitters of data may be contacted directly via [www.gisaid.org](http://www.gisaid.org)

Authors are sorted alphabetically.

| Accession ID                                                                                                                                                                                                                                                                                                                   | Originating Laboratory                                                                                                                                                                                                                                                                          | Submitting Laboratory                                                                                                                                                                                                                                                                            | Authors                                                                                                                                                                                                                                                                                                                                                                                                                                                             |
|--------------------------------------------------------------------------------------------------------------------------------------------------------------------------------------------------------------------------------------------------------------------------------------------------------------------------------|-------------------------------------------------------------------------------------------------------------------------------------------------------------------------------------------------------------------------------------------------------------------------------------------------|--------------------------------------------------------------------------------------------------------------------------------------------------------------------------------------------------------------------------------------------------------------------------------------------------|---------------------------------------------------------------------------------------------------------------------------------------------------------------------------------------------------------------------------------------------------------------------------------------------------------------------------------------------------------------------------------------------------------------------------------------------------------------------|
| EPI_ISL_455452                                                                                                                                                                                                                                                                                                                 | 1. ViroGenetics - BSL3 Laboratory of Virology, Malopolska Centre of Biotechnology, Jagiellonian University; 2. II Department of Internal Medicine, Faculty of Medicine, Jagiellonian University Medical College; 3. Narodowy Instytut Zdrowia Publicznego – Państwowy Zakład Higieny (NIZP-PZH) | 1. ViroGenetics - BSL3 Laboratory of Virology, Malopolska Centre of Biotechnology, Jagiellonian University; 2. II Department of Internal Medicine, Faculty of Medicine, Jagiellonian University Medical College; 3. Narodowy Instytut Zdrowia Publicznego – Państwowy Zakład Higieny (NIZP-PZH). | Agnieszka Kolakowska-Kulesza; Aleksandra A. Zasada; Aleksandra Milewska; Ewelina Hallman-Szelińska; Katarzyna Owczarek; Katarzyna Pancer; Katarzyna Zacharczuk; Krzysztof Pyró; Magdalena Rzeczkowska; Marek Sanak; Natalia Wolaniuk; Paweł P Łabaj; Tomasz Wołkowicz; Wojciech Braniccki                                                                                                                                                                           |
| EPI_ISL_510964                                                                                                                                                                                                                                                                                                                 | ARS Algarve - Laboratório Laura Ayres                                                                                                                                                                                                                                                           | Instituto Nacional de Saude (INSA)                                                                                                                                                                                                                                                               | Borges et al                                                                                                                                                                                                                                                                                                                                                                                                                                                        |
| EPI_ISL_420136                                                                                                                                                                                                                                                                                                                 | Akershus University Hospital, Department for Microbiology and Infectious Disease Control                                                                                                                                                                                                        | Norwegian Institute of Public Health, Department of Virology                                                                                                                                                                                                                                     | Hilde Elshaug; Kamilla Heddeland Instefjord; Karoline Bragstad; Kathrine Stene-Johansen; Olav Hungnes                                                                                                                                                                                                                                                                                                                                                               |
| EPI_ISL_569865, EPI_ISL_569866, EPI_ISL_569867, EPI_ISL_569868, EPI_ISL_569869, EPI_ISL_569870, EPI_ISL_569871, EPI_ISL_569872, EPI_ISL_569873, EPI_ISL_569874, EPI_ISL_569875, EPI_ISL_569876, EPI_ISL_569877, EPI_ISL_569878, EPI_ISL_569879, EPI_ISL_569880, EPI_ISL_569881, EPI_ISL_569882, EPI_ISL_569883, EPI_ISL_569886 | see above<br>Amedeo di savoia<br>Antwerp University Hospital                                                                                                                                                                                                                                    | Crosetto lab, Karolinska Institutet, SciLifeLab<br>Institute of Tropical Medicine                                                                                                                                                                                                                | Anna Sapino; Luuk Harbers; Maria Grazia Milia; Michele Simonetti; Nicola Crosetto; Ning Zhang; Valeria Ghisetti<br>Colin Anthony; Philippe Selhorst                                                                                                                                                                                                                                                                                                                 |
| EPI_ISL_457826                                                                                                                                                                                                                                                                                                                 | Army Medical Center - Scientific Department                                                                                                                                                                                                                                                     | Army Medical and Veterinary Research Center                                                                                                                                                                                                                                                      | Anna Anselmo; Antonella Fortunato; Florigio Lista; Francesco Giordani; Giovanni Faggioni; Nino D'Amore; Riccardo De Sanctis; Silvia Fillo; Vanessa Vera Fain                                                                                                                                                                                                                                                                                                        |
| EPI_ISL_457825                                                                                                                                                                                                                                                                                                                 | Army Medical Research Center - Scientific Department                                                                                                                                                                                                                                            | Army Medical and Veterinary Research Center                                                                                                                                                                                                                                                      | Anna Anselmo; Antonella Fortunato; Florigio Lista; Francesco Giordani; Giovanni Faggioni; Nino D'Amore; Riccardo De Sanctis; Silvia Fillo; Vanessa Vera Fain                                                                                                                                                                                                                                                                                                        |
| EPI_ISL_475830, EPI_ISL_475838, EPI_ISL_475843, EPI_ISL_475850, EPI_ISL_475853, EPI_ISL_475863, EPI_ISL_475869, EPI_ISL_475871, EPI_ISL_475875, EPI_ISL_475880                                                                                                                                                                 | see above<br>Austrian Agency for Health and Food Safety (AGES)                                                                                                                                                                                                                                  | Bergthaler laboratory, CeMM Research Center for Molecular Medicine of the Austrian Academy of Sciences                                                                                                                                                                                           | Alexander Lercher; Alexandra Popa; Andreas Bergthaler; Benedikt Agerer; Christoph Bock; Daniela Schmid; Dorothee von Laer; Elisabeth Puchhammer-Stoeckl; Franz Allerberger; Gregor Hörmann; Guenter Weiss; Henrique Colaco; Jakob-Wendelin Genger; Jan Laine; Judith Aberle; Kinga Rigler-Hohenwarter; Lukas Endler; Manfred Nairz; Mark Smyth; Martin Senekowitsch; Michael Schuster; Peter Hufnagl; Rainer Gattringer; Stephan Aberle; Thomas Penz; Wegene Borena |
| EPI_ISL_816817                                                                                                                                                                                                                                                                                                                 | Bioinformatics and Biostatistics Lab, Advanced Sequencing Facility                                                                                                                                                                                                                              | COVID-19 Genomics UK (COG-UK) Consortium                                                                                                                                                                                                                                                         | Aengus Stewart; Chelsea Sawyer; Harshil Patel; Jerome Nicodi; Laura Cubitt; Margaret Crawford                                                                                                                                                                                                                                                                                                                                                                       |
| EPI_ISL_516079, EPI_ISL_516080, EPI_ISL_516081, EPI_ISL_516082, EPI_ISL_516083, EPI_ISL_516084, EPI_ISL_516085, EPI_ISL_516086, EPI_ISL_516087, EPI_ISL_516088                                                                                                                                                                 | see above<br>Biomedical Sciences and Public Health, Polytechnic University of Marche<br>Bundeswehr Institute of Microbiology                                                                                                                                                                    | Biomedical Sciences and Public Health, Polytechnic University of Marche<br>Bundeswehr Institute of Microbiology                                                                                                                                                                                  | Alessandrini, F.; Bagnarelli, P.; Caucci, S.; Di Sante, L.; Melchionda, F.; Menzo, S.; Onofri, V.; Tagliabracchi, A.; Turchi, C.<br>Alexandra Rehn; Enrico Georgi; Malena Bestehorn-Willmann; Markus Antwerpen; Mathias Walter; Roman Wölfel; Sabine Zange                                                                                                                                                                                                          |
| EPI_ISL_732546, EPI_ISL_732564                                                                                                                                                                                                                                                                                                 |                                                                                                                                                                                                                                                                                                 |                                                                                                                                                                                                                                                                                                  |                                                                                                                                                                                                                                                                                                                                                                                                                                                                     |
| EPI_ISL_644269, EPI_ISL_644279, EPI_ISL_644286, EPI_ISL_644315, EPI_ISL_644335, EPI_ISL_644338, EPI_ISL_644340                                                                                                                                                                                                                 | see above<br>CEPHR / Vincent's Hospital                                                                                                                                                                                                                                                         | Irish Coronavirus Sequencing Consortium - National Virus Reference Laboratory                                                                                                                                                                                                                    | Alejandro Abner Garcia Leon; Gabriel Gonzalez; Michael Carr; Patrick Mallon                                                                                                                                                                                                                                                                                                                                                                                         |
| EPI_ISL_511653                                                                                                                                                                                                                                                                                                                 | CH VN Gaia - Espinho                                                                                                                                                                                                                                                                            | Instituto Nacional de Saude (INSA)                                                                                                                                                                                                                                                               | Borges et al                                                                                                                                                                                                                                                                                                                                                                                                                                                        |
| EPI_ISL_416503, EPI_ISL_416507                                                                                                                                                                                                                                                                                                 | CHRU Pontchaillou - Laboratoire de Virologie                                                                                                                                                                                                                                                    | National Reference Center for Viruses of Respiratory Infections, Institut Pasteur, Paris                                                                                                                                                                                                         | Angela Brisebarre; Etienne Simon-Lorière; Flora Donati; Gisèle Lagathu; Marion Barbet; Maud Vanpeene; Méline Bizard; Meline Albert; Sylvie Behillili; Sylvie van der Werf; Vincent Enouf                                                                                                                                                                                                                                                                            |
| EPI_ISL_649957, EPI_ISL_649961                                                                                                                                                                                                                                                                                                 | CHU Bordeaux                                                                                                                                                                                                                                                                                    | CNR Virus des Infections Respiratoires - France SUD                                                                                                                                                                                                                                              | Antonin Bal; Bruno Lina; Camille Ciccone; Gregory Destras; Gwendolyne Burfin; Hadrien Règue; Isabelle Garrigue; Laurence Josset; Marie-Edith Lafon; Martine Valette; Pantxika Bellecave; Pascale Trimoulet; Quentin Semanas                                                                                                                                                                                                                                         |
| EPI_ISL_660355                                                                                                                                                                                                                                                                                                                 | CHU Clermont-Ferrand                                                                                                                                                                                                                                                                            | CNR Virus des Infections Respiratoires - France SUD                                                                                                                                                                                                                                              | Amélie Brebion; Antonin Bal; Audrey Mirand; Bruno Lina; Christel Regagnon; Christine Archimbaud; Cécile Henquell; Gregory Destras; Gwendolyne Burfin; Hadrien Règue; Hélène Chabrolles; Laurence Josset; Martine Chambon; Martine Valette; Maxime Bisseux; Patricia Combes; Quentin Semanas                                                                                                                                                                         |
| EPI_ISL_418005                                                                                                                                                                                                                                                                                                                 | CHU Coimbra - Pediatrico                                                                                                                                                                                                                                                                        | Instituto Nacional de Saude (INSA)                                                                                                                                                                                                                                                               | Guiomar et al                                                                                                                                                                                                                                                                                                                                                                                                                                                       |
| EPI_ISL_645175                                                                                                                                                                                                                                                                                                                 | CHU de Limoges                                                                                                                                                                                                                                                                                  | CNR Virus des Infections Respiratoires - France SUD                                                                                                                                                                                                                                              | Antonin Bal; Bruno Lina; Gregory Destras; Gwendolyne Burfin; Hadrien Règue; Laurence Josset; Martine Valette; Quentin Semanas; Sylvie Rogez                                                                                                                                                                                                                                                                                                                         |
| EPI_ISL_693387                                                                                                                                                                                                                                                                                                                 | CHU de Nice - Hôpital Archet 2                                                                                                                                                                                                                                                                  | CNR Virus des Infections Respiratoires - France SUD                                                                                                                                                                                                                                              | Antonin Bal; Bruno Lina; Gregory Destras; Gwendolyne Burfin; Géraldine Gonfrier; Hadrien Règue; Laurence Josset; Martine Valette; Quentin Semanas; Valérie Giordanengo                                                                                                                                                                                                                                                                                              |
| EPI_ISL_641540                                                                                                                                                                                                                                                                                                                 | CHU de Saint-Étienne Hôpital Nord                                                                                                                                                                                                                                                               | CNR Virus des Infections Respiratoires - France SUD                                                                                                                                                                                                                                              | Antonin Bal; Bruno Lina; Bruno Pozzetto; Gregory Destras; Gwendolyne Burfin; Hadrien Règue; Issam Bechri; Laurence Josset; Manon Vogrir; Marine Delorme; Martine Valette; Quentin Semanas; Sylvie Pillet; Thomas Bourlet                                                                                                                                                                                                                                            |
| EPI_ISL_511037                                                                                                                                                                                                                                                                                                                 | CHULC - H Curry Cabral                                                                                                                                                                                                                                                                          | Instituto Nacional de Saude (INSA)                                                                                                                                                                                                                                                               | Borges et al                                                                                                                                                                                                                                                                                                                                                                                                                                                        |
| EPI_ISL_410486                                                                                                                                                                                                                                                                                                                 | CNR Virus des Infections Respiratoires - France SUD                                                                                                                                                                                                                                             | CNR Virus des Infections Respiratoires - France SUD                                                                                                                                                                                                                                              | Alexandre; Antonin; Bal; Bouscambert-Duchamp; Brengel-Pesce; Bruno.; Cheynet; Destras; Florence; Gaymard; Gregory; Josset; Karen; Laurence; Lina; Martine; Maude; Morfin-Sherpa; Valette; Valérie                                                                                                                                                                                                                                                                   |
| EPI_ISL_453892, EPI_ISL_453894                                                                                                                                                                                                                                                                                                 | CSM Camarate                                                                                                                                                                                                                                                                                    | Instituto Nacional de Saude (INSA)                                                                                                                                                                                                                                                               | Borges et al                                                                                                                                                                                                                                                                                                                                                                                                                                                        |
| EPI_ISL_419658, EPI_ISL_438064, EPI_ISL_438083                                                                                                                                                                                                                                                                                 | Center for Virology, Medical University of Vienna                                                                                                                                                                                                                                               | Bergthaler laboratory, CeMM Research Center for Molecular Medicine of the Austrian Academy of Sciences                                                                                                                                                                                           | Alexander Lercher; Alexandra Popa; Andreas Berghthaler; Benedikt Agerer; Christoph Bock; Dorothee von Laer; Elisabeth Puchhammer-Stoeckl; Elisabeth Puchhammer-Stöckl; Guenter Weiss; Henrique Colaco; Jakob-Wendelin Genger; Jan Laine; Judith Aberle; Lukas Endler; Manfred Nairz; Mark Smyth; Martin Senekowitsch; Michael Schuster; Stephan Aberle; Thomas Penz; Wegene Borena                                                                                  |
| EPI_ISL_516415, EPI_ISL_516421, EPI_ISL_677700, EPI_ISL_677701, EPI_ISL_677706                                                                                                                                                                                                                                                 | Center for public health - Skopje                                                                                                                                                                                                                                                               | Research Center for Genetic Engineering and Biotechnology "Georgi D. Efremov" , Macedonian Academy of Sciences and Arts                                                                                                                                                                          | RCGEB - MASA                                                                                                                                                                                                                                                                                                                                                                                                                                                        |
| EPI_ISL_414498                                                                                                                                                                                                                                                                                                                 | Center of Medical Microbiology, Virology, and Hospital Hygiene, University of Duesseldorf                                                                                                                                                                                                       | Center of Medical Microbiology, Virology, and Hospital Hygiene, University of Duesseldorf                                                                                                                                                                                                        | Alexander Dilthey; Andreas Walker; Björn-Erik Jensen; Daniel Strelow; Detlef Kindgen-Milles; Jörg Timm; Klaus Pfeffer; Malte Kohns Vasconcelos; Marcel Andree; Ortwin Adams; Sandra Hauka; Tina Senff; Tobias Wienemann; Torsten Feldt; Torsten Houwaart                                                                                                                                                                                                            |
| EPI_ISL_508944                                                                                                                                                                                                                                                                                                                 | Centre Hospitalier de Bourg en Bresse                                                                                                                                                                                                                                                           | CNR Virus des Infections Respiratoires - France SUD                                                                                                                                                                                                                                              | Alexandre Gaymard; Antonin Bal; Bruno Lina; Carine Moustaud; Florence Morfin-Sherpa; Gregory Destras; Gwendolyne Burfin; Laurence Josset; Martine Valette; Maude Bouscambert-Duchamp; Raphaëlle Lamy; Solenne Brun                                                                                                                                                                                                                                                  |
| EPI_ISL_666686, EPI_ISL_700389                                                                                                                                                                                                                                                                                                 | Centre hospitalier Métropole Savoie                                                                                                                                                                                                                                                             | CNR Virus des Infections Respiratoires - France SUD                                                                                                                                                                                                                                              | Antonin Bal; Bruno Lina; Carine Dumolard; Gregory Destras; Gwendolyne Burfin; Hadrien Règue; Jérôme Grosjean; Laurence Josset; Martine Valette; Quentin Semanas                                                                                                                                                                                                                                                                                                     |
| EPI_ISL_729478, EPI_ISL_729482, EPI_ISL_729496, EPI_ISL_729499, EPI_ISL_753822                                                                                                                                                                                                                                                 | Charité Universitätsmedizin Berlin, Institut für Virologie/Labor Berlin                                                                                                                                                                                                                         | Charité Universitätsmedizin Berlin, Institut für Virologie                                                                                                                                                                                                                                       | Barbara Mühlemann; Christian Drosten; Julia Schneider; Jörn Beheim-Schwarzbach; Talitha Veith; Terry Jones; Victor M Corman                                                                                                                                                                                                                                                                                                                                         |
| EPI_ISL_462450, EPI_ISL_462451, EPI_ISL_462452, EPI_ISL_462453, EPI_ISL_462454, EPI_ISL_462455, EPI_ISL_462456, EPI_ISL_462457, EPI_ISL_462458, EPI_ISL_462459, EPI_ISL_462460, EPI_ISL_462461, EPI_ISL_462463, EPI_ISL_462465, EPI_ISL_462466, EPI_ISL_462468, EPI_ISL_462469, EPI_ISL_462472, EPI_ISL_462473, EPI_ISL_462474 | see above<br>Clinical Center, University of Sarajevo                                                                                                                                                                                                                                            | Charite Universitätsmedizin Berlin, Institute of Virology                                                                                                                                                                                                                                        | Almedina Hadzihanovic-Moro; Amela Dedeic-Ljubovic; Barbara Muehlemann; Christian Drosten; Irma Salimovic-Besic; Jörn Beheim-Schwarzbach; Julia Schneider; Selma Mutevelic; Suzana Arapcic; Talitha Veith; Terry Jones; Victor M Corman                                                                                                                                                                                                                              |
| EPI_ISL_677718                                                                                                                                                                                                                                                                                                                 | Clinical Hospital - Bitola                                                                                                                                                                                                                                                                      | Research Center for Genetic Engineering and Biotechnology "Georgi D. Efremov" , Macedonian Academy of Sciences and Arts                                                                                                                                                                          | RCGEB - MASA                                                                                                                                                                                                                                                                                                                                                                                                                                                        |
| EPI_ISL_516427, EPI_ISL_677716                                                                                                                                                                                                                                                                                                 | Clinical Hospital - Shtip                                                                                                                                                                                                                                                                       | Research Center for Genetic Engineering and Biotechnology "Georgi D. Efremov" , Macedonian Academy of Sciences and Arts                                                                                                                                                                          | RCGEB - MASA                                                                                                                                                                                                                                                                                                                                                                                                                                                        |
| EPI_ISL_528045, EPI_ISL_528055, EPI_ISL_528073, EPI_ISL_528084, EPI_ISL_528092, EPI_ISL_528093, EPI_ISL_528113, EPI_ISL_528165, EPI_ISL_528179, EPI_ISL_528247, EPI_ISL_528315, EPI_ISL_581913                                                                                                                                 | see above<br>Clinical Virology                                                                                                                                                                                                                                                                  | Clinical Bacteriology                                                                                                                                                                                                                                                                            | Adrian Egli; Alexander Gensch; Alfredo Mari; Christian Nickel; Hans Hirsch; Hans Pargger; Helena MB Seth-Smith; Julia Bielicki; Karoline Leuzinger; Kirstine K. Soegaard; Madlen Stange; Manuel Battegay; Martin Siegemund; Michael Osthoff; Michael Schweitzer; Myrta Brunner; Rita Schneider-Silfemala; Roland Bingisser; Sarah Tschudin-Sutter; Simon Fuchs; Stefano Bassetti; Tim Roloff                                                                        |
| EPI_ISL_454602                                                                                                                                                                                                                                                                                                                 | Croatian Institute of Public Health                                                                                                                                                                                                                                                             | University of Zagreb, Centre for research and knowledge transfer in biotechnology                                                                                                                                                                                                                | Anamarija Slovic; Irena Tabain; Jelena Ivancic Jelecki; Tatjana Vilibic-Cavlek                                                                                                                                                                                                                                                                                                                                                                                      |
| EPI_ISL_516922, EPI_ISL_516923, EPI_ISL_516924, EPI_ISL_516925, EPI_ISL_516926, EPI_ISL_516927, EPI_ISL_516928, EPI_ISL_516929, EPI_ISL_516930, EPI_ISL_516931, EPI_ISL_516932, EPI_ISL_516933                                                                                                                                 | see above<br>Department for Molecular Diagnostics, Centre for Medical Microbiology, Institute of Public Health of Montenegro                                                                                                                                                                    | Charité Universitätsmedizin Berlin, Institut für Virologie                                                                                                                                                                                                                                       | Barbara Muehlemann; Christian Drosten; Julia Schneider; Jörn Beheim-Schwarzbach; Marija Govedarica and Danijela Vujošević; Talitha Veith; Terry Jones; Victor M Corman                                                                                                                                                                                                                                                                                              |
| EPI_ISL_626326                                                                                                                                                                                                                                                                                                                 | Department of Clinical Microbiology                                                                                                                                                                                                                                                             | GIGA Medical Genomics                                                                                                                                                                                                                                                                            | Bouchra Boujemla; Cécile Meex; Keith Durkin; Maria Artesi; Marie-Pierre Hayette; Pierrette Melin; Raphaël Boreux; Sébastien Bontems; Vincent Bours                                                                                                                                                                                                                                                                                                                  |
| EPI_ISL_429279, EPI_ISL_429295, EPI_ISL_429328                                                                                                                                                                                                                                                                                 | Department of Clinical Microbiology, Copenhagen University Hospital, Hvidovre, Kettegaard Alle 30, 2650 Hvidovre.                                                                                                                                                                               | Albertsen lab, Department of Chemistry and Bioscience, Aalborg University, Denmark                                                                                                                                                                                                               | Rasmus Kirkegaard                                                                                                                                                                                                                                                                                                                                                                                                                                                   |

|                                                                                                                                                                                                                                                                                                                                |                                                                                                                                             |                                                                                                                                     |                                                                                                                                                                                                                                                                                                                                                                                                                                                                                                                                                                                                                                                                                                                                                                                        |
|--------------------------------------------------------------------------------------------------------------------------------------------------------------------------------------------------------------------------------------------------------------------------------------------------------------------------------|---------------------------------------------------------------------------------------------------------------------------------------------|-------------------------------------------------------------------------------------------------------------------------------------|----------------------------------------------------------------------------------------------------------------------------------------------------------------------------------------------------------------------------------------------------------------------------------------------------------------------------------------------------------------------------------------------------------------------------------------------------------------------------------------------------------------------------------------------------------------------------------------------------------------------------------------------------------------------------------------------------------------------------------------------------------------------------------------|
| EPI_ISL_507206,<br>EPI_ISL_507208,<br>EPI_ISL_507209,<br>EPI_ISL_507212                                                                                                                                                                                                                                                        | Department of Experimental Modeling and Pathogenesis of Infectious Diseases                                                                 | WHO National Influenza Centre Russian Federation                                                                                    | Andrey Komissarov; Anna Ivanova; Artem Fadeev; Daria Danilenko; Mariia Sergeeva                                                                                                                                                                                                                                                                                                                                                                                                                                                                                                                                                                                                                                                                                                        |
| EPI_ISL_457699,<br>EPI_ISL_457700,<br>EPI_ISL_457721,<br>EPI_ISL_457724,<br>EPI_ISL_457749                                                                                                                                                                                                                                     | Department of Infectious Diseases, Istituto Superiore di Sanità, Roma , Italy                                                               | Army Medical and Veterinary Research Center                                                                                         | Alessandra Lo Presti; Anna Anselmo; Antonella Fortunato; Antonella Marchi; Concetta Fabiani Silvia Fillo; Concetta Fabiani Silvia Fillo; Eleonora Benedetti; Florigio Lista; Francesco Giordani; Giovanni Faggioni; Nino D'Amore; Paola Stefanelli; Riccardo De Sanctis; Stefano Fiore; Vanessa Vera Fain                                                                                                                                                                                                                                                                                                                                                                                                                                                                              |
| EPI_ISL_406596,<br>EPI_ISL_406597,<br>EPI_ISL_408430                                                                                                                                                                                                                                                                           | Department of Infectious and Tropical Diseases, Bichat Claude Bernard Hospital, Paris                                                       | National Reference Center for Viruses of Respiratory Infections, Institut Pasteur, Paris                                            | Angela Brisebarre; Flora Donati; Marion Barbet; Maud Vanpeene; Mélanie Albert; Méline Bizard; Sylvie Behillili; Sylvie van der Werf; Vincent Enouf; Xavier Lescure; Xavier Lescure.; Yazdan Yazdanpanah                                                                                                                                                                                                                                                                                                                                                                                                                                                                                                                                                                                |
| EPI_ISL_803882                                                                                                                                                                                                                                                                                                                 | Department of Medical Biotechnologies, University of Siena                                                                                  | Laboratory of Infectious Diseases, Department of Biomedical and Clinical Sciences L. Sacco, University of Milan                     | Alessia Lai; Annalisa Bergna; Carla Della Ventura; Claudia Balotta; Filippo Dragoni; Gianguglielmo Zehender on behalf of SARS-CoV-2 ITALIAN RESEARCH ENTERPRISE-(SCIRE) Collaborative Group; Ilaria Vicenti; Maria Grazia Cusi; Massimo Galli; Maurizio Zazzi                                                                                                                                                                                                                                                                                                                                                                                                                                                                                                                          |
| EPI_ISL_454733                                                                                                                                                                                                                                                                                                                 | Department of Medical, Biotechnologies University of Siena                                                                                  | Department of Medical, Biotechnologies University of Siena                                                                          | Anichini, G.; Cusi; G. and Santoro, F.; Gandolfo, C.; M.G.; Pinzauti, D.; Pozzi                                                                                                                                                                                                                                                                                                                                                                                                                                                                                                                                                                                                                                                                                                        |
| EPI_ISL_812968                                                                                                                                                                                                                                                                                                                 | Department of Molecular Medicine, University of Padova                                                                                      | Department of Molecular Medicine, University of Padova                                                                              | Abate, D.; Barzon, L.; Besutti, V.; De Canale, E.; Del Vecchio, C.; Franchin, E.; Lavezzo, E.; Lorean, A.; M.C.; Manganelli, R.; Manuto, L.; Masi, G.; Onella, F.; Pacenti, M.; Parisi, Rossi, L.; S. and Crisanti, A.; S.G.; Saluzzo, F.; Sciro, M.; Toppo; Trevisan, M.; Vanuzzo                                                                                                                                                                                                                                                                                                                                                                                                                                                                                                     |
| EPI_ISL_723870,<br>EPI_ISL_723911                                                                                                                                                                                                                                                                                              | Department of Pathology, University of Cambridge                                                                                            | COVID-19 Genomics UK (COG-UK) Consortium                                                                                            | Aminu S. Jahun; Grant Hall; Ian Goodfellow; Iliana Georgana; Malte Pinckert; Martin D. Curran; Myra Hosmillo; Surendra Parmar; Yasmin Chaudhry                                                                                                                                                                                                                                                                                                                                                                                                                                                                                                                                                                                                                                         |
| EPI_ISL_441711, EPI_ISL_441726, EPI_ISL_443007, EPI_ISL_459412, EPI_ISL_459413, EPI_ISL_459479, EPI_ISL_470383, EPI_ISL_489384                                                                                                                                                                                                 |                                                                                                                                             |                                                                                                                                     |                                                                                                                                                                                                                                                                                                                                                                                                                                                                                                                                                                                                                                                                                                                                                                                        |
| see above                                                                                                                                                                                                                                                                                                                      | Department of Pathology, University of Cambridge                                                                                            | Wellcome Sanger Institute for the COVID-19 Genomics UK (COG-UK) consortium                                                          | Alex Alderton; Aminu S. Jahun; Anna Yakovleva; Charlotte J. Houldcroft; Cordelia Langford; David K. Jackson; Dominic Kwiatkowski; Ewan Harrison; Fahad A Khokhar; Grant Hall; Ian Goodfellow; Ian Johnston; John Sillitoe on behalf of the Wellcome Sanger Institute COVID-19 Surveillance Team (http://www.sanger.ac.uk/covid-team); Laura G Caller; Luke W Meredith; M. Estée Török; Martin D. Curran; Myra Hosmillo; Roberto Amato; Sarah L. Caddy; Sonia Goncalves; Theresa Feltwell; William L. Hamilton; and Alex Alderton                                                                                                                                                                                                                                                       |
| EPI_ISL_413603, EPI_ISL_414642, EPI_ISL_414646, EPI_ISL_418386, EPI_ISL_418391, EPI_ISL_418403, EPI_ISL_418411, EPI_ISL_481623, EPI_ISL_481639, EPI_ISL_481640, EPI_ISL_481662, EPI_ISL_481704, EPI_ISL_481711, EPI_ISL_481732, EPI_ISL_757368, EPI_ISL_757370, EPI_ISL_759813, EPI_ISL_759815, EPI_ISL_759816, EPI_ISL_759817 |                                                                                                                                             |                                                                                                                                     |                                                                                                                                                                                                                                                                                                                                                                                                                                                                                                                                                                                                                                                                                                                                                                                        |
| see above                                                                                                                                                                                                                                                                                                                      | Department of Virology and Immunology, University of Helsinki and Helsinki University Hospital, Huslab Finland                              | Department of Virology, Faculty of Medicine, University of Helsinki, Helsinki, Finland                                              | Hannimari Kallio-Kokko; Harri Kangas; Hussein Alburkat; Jenni Virtanen; Maija Suvanto; Olli Vapalahti; Pekka Ellonen; Phuoc Truong; Ravi Kant; Sari Hannula; Teemu Smura                                                                                                                                                                                                                                                                                                                                                                                                                                                                                                                                                                                                               |
| EPI_ISL_682547                                                                                                                                                                                                                                                                                                                 | Department of Virus and Microbiological Special Diagnostics, Statens Serum Institut, Copenhagen, Denmark                                    | Albertsen Lab, Department of Chemistry and Bioscience, Aalborg University, Denmark                                                  | Danish Covid-19 Genome Consortium                                                                                                                                                                                                                                                                                                                                                                                                                                                                                                                                                                                                                                                                                                                                                      |
| EPI_ISL_429360, EPI_ISL_429373, EPI_ISL_429420, EPI_ISL_429421, EPI_ISL_429427, EPI_ISL_429542, EPI_ISL_429583, EPI_ISL_437659, EPI_ISL_444849, EPI_ISL_444909, EPI_ISL_444946                                                                                                                                                 |                                                                                                                                             |                                                                                                                                     |                                                                                                                                                                                                                                                                                                                                                                                                                                                                                                                                                                                                                                                                                                                                                                                        |
| see above                                                                                                                                                                                                                                                                                                                      | Department of Virus and Microbiological Special Diagnostics, Statens Serum Institut, Copenhagen, Denmark; Artillerivej 5, 2300 Copenhagen S | Albertsen lab, Department of Chemistry and Bioscience, Aalborg University, Denmark                                                  | Rasmus Kirkegaard                                                                                                                                                                                                                                                                                                                                                                                                                                                                                                                                                                                                                                                                                                                                                                      |
| EPI_ISL_614436,<br>EPI_ISL_614440,<br>EPI_ISL_614443,<br>EPI_ISL_614444,<br>EPI_ISL_614556,<br>EPI_ISL_618808                                                                                                                                                                                                                  | Department of Virus and Microbiological Special Diagnostics, Statens Serum Institut, Denmark                                                | Albertsen lab, Department of Chemistry and Bioscience, Aalborg University, Denmark                                                  | Danish Covid-19 Genome Consortia                                                                                                                                                                                                                                                                                                                                                                                                                                                                                                                                                                                                                                                                                                                                                       |
| EPI_ISL_447837                                                                                                                                                                                                                                                                                                                 | Dept. of Medical Microbiology, Stavanger University Hospital, Helse Stavanger HF,                                                           | Norwegian Institute of Public Health, Department of Virology                                                                        | Hilde Elshaug; Kamilla Heddeland Instefjord; Karoline Bragstad; Kathrine Stene-Johansen; Olav Hungnes; Rasmus Riis Kopperud                                                                                                                                                                                                                                                                                                                                                                                                                                                                                                                                                                                                                                                            |
| EPI_ISL_475562,<br>EPI_ISL_475563                                                                                                                                                                                                                                                                                              | Din Klinik                                                                                                                                  | The Public Health Agency of Sweden                                                                                                  | Anna Risberg; Anna-Malin Linde; Karin Tegmark-Wisell; Maria Lind Karlberg; Mattias Haukland; Mia Brytting; Olov Svartstrom; Oskar Karlsson Lindsjö; Reza Advani; Sandra Broddesson                                                                                                                                                                                                                                                                                                                                                                                                                                                                                                                                                                                                     |
| EPI_ISL_591326, EPI_ISL_591327, EPI_ISL_591328, EPI_ISL_591330, EPI_ISL_591331, EPI_ISL_591333, EPI_ISL_591334                                                                                                                                                                                                                 |                                                                                                                                             |                                                                                                                                     |                                                                                                                                                                                                                                                                                                                                                                                                                                                                                                                                                                                                                                                                                                                                                                                        |
| see above                                                                                                                                                                                                                                                                                                                      | Dipartimento di Biotechnologie Mediche, University of Siena                                                                                 | Dipartimento di Biotechnologie Mediche, University of Siena                                                                         | Anichini, G.; Cusi; Gandolfo, C.; M.G.; Pinzauti, D.; Pozzi, G.; Santoro, F.                                                                                                                                                                                                                                                                                                                                                                                                                                                                                                                                                                                                                                                                                                           |
| EPI_ISL_722856,<br>EPI_ISL_722857                                                                                                                                                                                                                                                                                              | Dipartimento di Scienze Biomediche e Oncologia Umana - Azienda Ospedaliero Universitaria Consorziale Policlinico                            | Istituto Zooprofilattico Sperimentale della Puglia e della Basilicata                                                               | Bianco A.; Capozzi L.; Chironna M.; Del Sambro L.; Loconsole D.; Parisi A.                                                                                                                                                                                                                                                                                                                                                                                                                                                                                                                                                                                                                                                                                                             |
| EPI_ISL_497998                                                                                                                                                                                                                                                                                                                 | Division of Viral Diseases, Center for Laboratory Control of Infectious Diseases, Korea Centers for Diseases Control and Prevention         | Division of Viral Diseases, Center for Laboratory Control of Infectious Diseases, Korea Centers for Diseases Control and Prevention | Heui Man Kim; Hye-jun Jo; Jeong-Min Kim; Jun-Sub Kim; Myung Guk Han; Namjoo Lee; Sang Hee Woo; Yoon-Seok Chung                                                                                                                                                                                                                                                                                                                                                                                                                                                                                                                                                                                                                                                                         |
| EPI_ISL_583759,<br>EPI_ISL_583760,<br>EPI_ISL_583771                                                                                                                                                                                                                                                                           | Dr. Gernot Walder GmbH                                                                                                                      | Berghaler laboratory, CeMM Research Center for Molecular Medicine of the Austrian Academy of Sciences                               | Adi Steinrigl; Alexander Lercher; Alexandra Popa; Andreas Berghaler; Benedikt Agerer; Christian Paar; Christoph Bock; Daniela Schmid; Dorothee von Laer; Elisabeth Puchhammer-Stoeckl; Franz Allerberger; Gernot Walder; Gregor Hörmann; Guenter Weiss; Gunther Vogl; Henrique Colaco; Jakob-Wendelin Genger; Jan Laine; Judith Aberle; Kinga Rigler-Hohenwarter; Lukas Endler; Manfred Nairz; Mark Smyth; Martin Senekowitsch; Michael Schuster; Peter Hufnagl; Peter Obrist; Rainer Gattringer; Sabine Sussitz-Rack; Stephan Aberle; Thomas Penz; Wegene Borena                                                                                                                                                                                                                      |
| EPI_ISL_4115491, EPI_ISL_422653, EPI_ISL_422684, EPI_ISL_422736, EPI_ISL_422765, EPI_ISL_422816, EPI_ISL_422818, EPI_ISL_422821, EPI_ISL_422834, EPI_ISL_461105                                                                                                                                                                |                                                                                                                                             |                                                                                                                                     |                                                                                                                                                                                                                                                                                                                                                                                                                                                                                                                                                                                                                                                                                                                                                                                        |
| see above                                                                                                                                                                                                                                                                                                                      | Dutch COVID-19 response team                                                                                                                | Erasmus Medical Center                                                                                                              | Anne van der Linden; Anнемiek van der Eijk; Aura Timen; Bas Oude Munnink; Claudia Schapendonk; Corien Swaan; Corine GeurtsvanKessel; David Nieuwenhuijse; Irina Chestakova; Jeroen van Kampen; Jolanda Voermans; Madelief Mollers; Manon Haverkate; Marion Koopmans; Mark Pronk; Mart Stein; Pascal Lexmond; Reina Sikkema; Richard Molenkamp; Sandra Kengne Kamga Mbou; Stefan van Nieuwkoop; Theo Bestebroer; on behalf of the Dutch national COVID-19 response team.                                                                                                                                                                                                                                                                                                                |
| EPI_ISL_636552, EPI_ISL_804380, EPI_ISL_804382, EPI_ISL_804383, EPI_ISL_804384, EPI_ISL_804385, EPI_ISL_804394, EPI_ISL_804415                                                                                                                                                                                                 |                                                                                                                                             |                                                                                                                                     |                                                                                                                                                                                                                                                                                                                                                                                                                                                                                                                                                                                                                                                                                                                                                                                        |
| see above                                                                                                                                                                                                                                                                                                                      | Dutch COVID-19 response team                                                                                                                | National Institute for Public Health and the Environment (RIVM)                                                                     | Adam Meijer; AnneMarie van den Brandt; Bas van der Veer; Chantal Reusken; Dennis Schmitz; Dirk Eggink; Florian Zwagemaker; Harry Vennema; Jeroen Cremer; Matthijs Welkers; Sharon van den Brink; on behalf of the national COVID-19 response team                                                                                                                                                                                                                                                                                                                                                                                                                                                                                                                                      |
| EPI_ISL_419691                                                                                                                                                                                                                                                                                                                 | E. Gulbja Laboratorija                                                                                                                      | Charité Universitätsmedizin Berlin, Institute of Virology                                                                           | Barbara Mühlemann; Christian Drosten; Dmitrijs Perminovs; Dr. Didzis Gavars; Jörn Beheim-Schwarzbach; Julia Schneider; Mikus Gavars; Talitha Velth; Terry Jones; Victor M Corman                                                                                                                                                                                                                                                                                                                                                                                                                                                                                                                                                                                                       |
| EPI_ISL_421654                                                                                                                                                                                                                                                                                                                 | E. Gulbja Laboratorija                                                                                                                      | Latvian Biomedical Research and Study Centre                                                                                        | Dmitrijs Perminovs; Ivars Silamikelis; Jānis Klovīns; Kaspars Megnis; Mikus Gavars; Monta Ustinova; Uga Dumpis; Vita Rovite; Nikita Zrelavs                                                                                                                                                                                                                                                                                                                                                                                                                                                                                                                                                                                                                                            |
| EPI_ISL_486856                                                                                                                                                                                                                                                                                                                 | Emergency County Hospital                                                                                                                   | Stefan cel Mare, University Metagenomics lab                                                                                        | Lobiuc Andrei et al.                                                                                                                                                                                                                                                                                                                                                                                                                                                                                                                                                                                                                                                                                                                                                                   |
| EPI_ISL_526937, EPI_ISL_526938, EPI_ISL_526939, EPI_ISL_526940, EPI_ISL_526941, EPI_ISL_526943, EPI_ISL_526946, EPI_ISL_614298, EPI_ISL_614304, EPI_ISL_614307, EPI_ISL_614311                                                                                                                                                 |                                                                                                                                             |                                                                                                                                     |                                                                                                                                                                                                                                                                                                                                                                                                                                                                                                                                                                                                                                                                                                                                                                                        |
| see above                                                                                                                                                                                                                                                                                                                      | Faroese National Reference Laboratory for Fish and Animal Diseases                                                                          | Faroese National Reference Laboratory for Fish and Animal Diseases                                                                  | Debes Hammershaibm Christiansen; Maria Marjunardóttir Dahl; Petra Elisabeth Petersen                                                                                                                                                                                                                                                                                                                                                                                                                                                                                                                                                                                                                                                                                                   |
| EPI_ISL_451966                                                                                                                                                                                                                                                                                                                 | Federal Budget Institution of Science, State Research Center for Applied Microbiology & Biotechnology                                       | Federal Budget Institution of Science, State Research Center for Applied Microbiology & Biotechnology                               | Abaimova A; Bakhteeva I; Blagodatskikh S; Bogun A; Borzilov A; Chekan L; Chernysh S; Denisenko E; Dentovskaya S; Detushev K; Detusheva E; Dyatlov I; Firstova V; Frolov V; Fursov M; Fursova N; Galkina E; Gapelchenkova T; Göncharova J; Gorbатов A; Hlyntseva A; Ivāņov S; Kaimantayev T; Kaimantayeva O; Kanaschenko M; Kartsev N; Kartseva A; Khomyakov A; Khramov M; Kislichkina A; Kolchayanova A; Koroleva-Ushakova A; Kosilova I; Krasilinikova E; Kuzin V; Kuzina E; Makarova M; Marin M; Novikova T; Platonov M; Podkopayev Y; Ryabko A; Shaikhtudinova R; Shemyakin I; Shishkina L; Slukina M; Sizova A; Skryabin Y; Siukin P; Siukina N; Solomentsev V; Solovieva A; Teymurazov M; Timofeev V; Titareva G; Trunyakova A; Tyurin E; Vagayskaya A; Zeninskaya N; Zhumakaev R |
| EPI_ISL_500776,<br>EPI_ISL_500777                                                                                                                                                                                                                                                                                              | Foerde Hospital, Department of Microbiology                                                                                                 | Norwegian Institute of Public Health, Department of Virology                                                                        | Hilde Elshaug; Kamilla Heddeland Instefjord; Karoline Bragstad; Kathrine Stene-Johansen; Olav Hungnes                                                                                                                                                                                                                                                                                                                                                                                                                                                                                                                                                                                                                                                                                  |
| EPI_ISL_420145                                                                                                                                                                                                                                                                                                                 | Forde Hospital Department of Microbiology                                                                                                   | Norwegian Institute of Public Health, Department of Virology                                                                        | Hilde Elshaug; Kamilla Heddeland Instefjord; Karoline Bragstad; Kathrine Stene-Johansen; Olav Hungnes                                                                                                                                                                                                                                                                                                                                                                                                                                                                                                                                                                                                                                                                                  |
| EPI_ISL_419237                                                                                                                                                                                                                                                                                                                 | Fundacion Jimenez Diaz                                                                                                                      | Instituto de Salud Carlos III                                                                                                       | Camarero, S.; Casas, I.; Cuesta, I.; Fernández, R.; González-Esguevillas, M.; Jiménez, M.; Jiménez, P.; Juliá, M.; Molinero Calamita, M.; Monzón, S.; Pozo, F.; Varona, S.; Zaballos, A.                                                                                                                                                                                                                                                                                                                                                                                                                                                                                                                                                                                               |
| EPI_ISL_420146,<br>EPI_ISL_420313                                                                                                                                                                                                                                                                                              | Furst Medical Laboratory                                                                                                                    | Norwegian Institute of Public Health, Department of Virology                                                                        | Hilde Elshaug; Kamilla Heddeland Instefjord; Karoline Bragstad; Kathrine Stene-Johansen; Olav Hungnes                                                                                                                                                                                                                                                                                                                                                                                                                                                                                                                                                                                                                                                                                  |
| EPI_ISL_509004                                                                                                                                                                                                                                                                                                                 | GH Les Portes du Sud                                                                                                                        | CNR Virus des Infections Respiratoires - France SUD                                                                                 | Alexandre Gaymard; Antonin Bal; Bruno Lina; Carine Moustaud; Florence Morfin-Sherpa; Gregory Destras; Gwendolynne Burfin; Laurence Josset; Martine Valette; Maude Bouscambert-Duchamp; Raphaëlle Lamy; Solenne Brun                                                                                                                                                                                                                                                                                                                                                                                                                                                                                                                                                                    |
| EPI_ISL_516413                                                                                                                                                                                                                                                                                                                 | General Hospital - Kumanovo                                                                                                                 | Research Center for Genetic Engineering and Biotechnology "Georgi D. Efremov" , Macedonian Academy of Sciences and Arts             | RCGEB - MASA                                                                                                                                                                                                                                                                                                                                                                                                                                                                                                                                                                                                                                                                                                                                                                           |
| EPI_ISL_677726,<br>EPI_ISL_678255                                                                                                                                                                                                                                                                                              | General Hospital - Ohrid                                                                                                                    | Research Center for Genetic Engineering and Biotechnology "Georgi D. Efremov" , Macedonian Academy of Sciences and Arts             | RCGEB - MASA                                                                                                                                                                                                                                                                                                                                                                                                                                                                                                                                                                                                                                                                                                                                                                           |
| EPI_ISL_677674,<br>EPI_ISL_677703,<br>EPI_ISL_677712,<br>EPI_ISL_677713,<br>EPI_ISL_677714,<br>EPI_ISL_678258                                                                                                                                                                                                                  | General Hospital - Prilep                                                                                                                   | Research Center for Genetic Engineering and Biotechnology "Georgi D. Efremov" , Macedonian Academy of Sciences and Arts             | RCGEB - MASA                                                                                                                                                                                                                                                                                                                                                                                                                                                                                                                                                                                                                                                                                                                                                                           |
| EPI_ISL_678254                                                                                                                                                                                                                                                                                                                 | General Hospital - Strumica                                                                                                                 | Research Center for Genetic Engineering and Biotechnology "Georgi D. Efremov" , Macedonian Academy of Sciences and Arts             | RCGEB - MASA                                                                                                                                                                                                                                                                                                                                                                                                                                                                                                                                                                                                                                                                                                                                                                           |
| EPI_ISL_677675,<br>EPI_ISL_677710                                                                                                                                                                                                                                                                                              | General Hospital - Veles                                                                                                                    | Research Center for Genetic Engineering and Biotechnology "Georgi D. Efremov" , Macedonian Academy of Sciences and Arts             | RCGEB - MASA                                                                                                                                                                                                                                                                                                                                                                                                                                                                                                                                                                                                                                                                                                                                                                           |
| EPI_ISL_735268,<br>EPI_ISL_735273,<br>EPI_ISL_735275,<br>EPI_ISL_735281,<br>EPI_ISL_735284,                                                                                                                                                                                                                                    | Genomic Laboratory (GLAB) (Conjoint lab of Health Directorate of Istanbul and Istanbul Technical University)                                | Genomic Laboratory (GLAB), Istanbul Technical University                                                                            | Arzu Irvem; Ayse Serra Ozel; Betsi Kose; Gizem Alkurt; Gizem Dinler Doganay; Ilker Karacan; Jale Yildiz; Levent Doganay; Mehtap Aydin; Nihat Bugra Agaoglu; Nilsun Altunal; Nisan Denizce Can; Ozlem Akgun Dogan; Payam Zolfagharian; Tubga Kizilboga Akgun; Yasemin Kendir Demirkol                                                                                                                                                                                                                                                                                                                                                                                                                                                                                                   |

|                |                                                                                                                                                                                                                                                                                                                |                                                                                                                                               |                                                                                                                                                                                                                                                                                                                                                                                                                                                                                                                                                                    |
|----------------|----------------------------------------------------------------------------------------------------------------------------------------------------------------------------------------------------------------------------------------------------------------------------------------------------------------|-----------------------------------------------------------------------------------------------------------------------------------------------|--------------------------------------------------------------------------------------------------------------------------------------------------------------------------------------------------------------------------------------------------------------------------------------------------------------------------------------------------------------------------------------------------------------------------------------------------------------------------------------------------------------------------------------------------------------------|
| EPI_ISL_735285 |                                                                                                                                                                                                                                                                                                                |                                                                                                                                               |                                                                                                                                                                                                                                                                                                                                                                                                                                                                                                                                                                    |
| EPI_ISL_453869 | H Beatriz Angelo                                                                                                                                                                                                                                                                                               | Instituto Nacional de Saude (INSA)                                                                                                            | Borges et al                                                                                                                                                                                                                                                                                                                                                                                                                                                                                                                                                       |
| EPI_ISL_418020 | H Braga                                                                                                                                                                                                                                                                                                        | Instituto Nacional de Saude (INSA)                                                                                                            | Guiomar et al                                                                                                                                                                                                                                                                                                                                                                                                                                                                                                                                                      |
| EPI_ISL_418021 |                                                                                                                                                                                                                                                                                                                |                                                                                                                                               |                                                                                                                                                                                                                                                                                                                                                                                                                                                                                                                                                                    |
| EPI_ISL_418026 | H Dr Nelio Mendonca - Funchal                                                                                                                                                                                                                                                                                  | Instituto Nacional de Saude (INSA)                                                                                                            | Borges et al; Guiomar et al                                                                                                                                                                                                                                                                                                                                                                                                                                                                                                                                        |
| EPI_ISL_454318 |                                                                                                                                                                                                                                                                                                                |                                                                                                                                               |                                                                                                                                                                                                                                                                                                                                                                                                                                                                                                                                                                    |
| EPI_ISL_453840 | H Evora                                                                                                                                                                                                                                                                                                        | Instituto Nacional de Saude (INSA)                                                                                                            | Borges et al                                                                                                                                                                                                                                                                                                                                                                                                                                                                                                                                                       |
| EPI_ISL_453847 |                                                                                                                                                                                                                                                                                                                |                                                                                                                                               |                                                                                                                                                                                                                                                                                                                                                                                                                                                                                                                                                                    |
| EPI_ISL_418025 | H Santarem                                                                                                                                                                                                                                                                                                     | Instituto Nacional de Saude (INSA)                                                                                                            | Guiomar et al                                                                                                                                                                                                                                                                                                                                                                                                                                                                                                                                                      |
| EPI_ISL_602368 | HELIX LLC                                                                                                                                                                                                                                                                                                      | WHO National Influenza Centre Russian Federation                                                                                              | Andrey Komissarov; Anna Ivanova; Artem Fadeev; Daria Danilenko; Dmitry Bazhenov; Dmitry Lioznov; Elena Nabieva; Georgii Bazykin; Ksenia Safina; Kseniya Komissarova                                                                                                                                                                                                                                                                                                                                                                                                |
| EPI_ISL_733077 |                                                                                                                                                                                                                                                                                                                |                                                                                                                                               |                                                                                                                                                                                                                                                                                                                                                                                                                                                                                                                                                                    |
| EPI_ISL_733151 |                                                                                                                                                                                                                                                                                                                |                                                                                                                                               |                                                                                                                                                                                                                                                                                                                                                                                                                                                                                                                                                                    |
| EPI_ISL_418243 | HOSPITAL UNIVERSITARIO VIRGEN DE LAS NIEVES                                                                                                                                                                                                                                                                    | Instituto de Salud Carlos III                                                                                                                 | A. Monzón; F. Casas; I. Jiménez; I. Sanbonmatsu S.; Iglesias-Caballero; M. Camarero; M. Cuesta; M. González-Esguevillas; M. Molinero Calamita; M. Zaballos; P. Jiménez; S. Juliá; S. Pozo; S. Varona                                                                                                                                                                                                                                                                                                                                                               |
| EPI_ISL_418244 |                                                                                                                                                                                                                                                                                                                |                                                                                                                                               |                                                                                                                                                                                                                                                                                                                                                                                                                                                                                                                                                                    |
| EPI_ISL_454446 | Halmstad klinisk mikrobiologi                                                                                                                                                                                                                                                                                  | The Public Health Agency of Sweden                                                                                                            | Anna Risberg; Anna-Malin Linde; Karin Tegmark-Wisell; Maria Lind Karlberg; Mattias Haukland; Olov Svartstrom; Oskar Karlsson Lindsjo; Petra Edquist; Reza Advani; Sandra Broddesson; Shamam Muradrasoli; Shaman Muradrasoli                                                                                                                                                                                                                                                                                                                                        |
| EPI_ISL_475553 |                                                                                                                                                                                                                                                                                                                |                                                                                                                                               |                                                                                                                                                                                                                                                                                                                                                                                                                                                                                                                                                                    |
| EPI_ISL_475556 |                                                                                                                                                                                                                                                                                                                |                                                                                                                                               |                                                                                                                                                                                                                                                                                                                                                                                                                                                                                                                                                                    |
| EPI_ISL_450498 | Health Board Laboratory of Communicable Diseases                                                                                                                                                                                                                                                               | Charite Universitätsmedizin Berlin, Institute of Virology                                                                                     | Barbara Mühlemann; Christian Drosten; Julia Schneider; Jörn Beheim-Schwarzbach; Liidia Dotsenko; Natalja Kuznetsova; Talitha Veith; Terry Jones; Victor M Corman                                                                                                                                                                                                                                                                                                                                                                                                   |
| EPI_ISL_420067 | Health Board Laboratory of Communicable Diseases                                                                                                                                                                                                                                                               | Charité Universitätsmedizin Berlin, Institute of Virology                                                                                     | Barbara Mühlemann; Christian Drosten; Jörn Beheim-Schwarzbach; Julia Schneider; Liidia Dotsenko; Natalja Kuznetsova; Talitha Veith; Terry Jones; Victor M Corman                                                                                                                                                                                                                                                                                                                                                                                                   |
| EPI_ISL_450526 | Hematology Laboratory, Section of Molecular Diagnostics, University                                                                                                                                                                                                                                            | Department of Virology, Faculty of Medicine, University of Helsinki,                                                                          | Aneta Szulc; Maciej Grzybek; Marlena Robakowska; Olli Vapalahti; Teemu Smura                                                                                                                                                                                                                                                                                                                                                                                                                                                                                       |
| EPI_ISL_450528 | Clinical Centre, Medical University of Gdansk                                                                                                                                                                                                                                                                  | Helsinki, Finland                                                                                                                             |                                                                                                                                                                                                                                                                                                                                                                                                                                                                                                                                                                    |
| EPI_ISL_450530 |                                                                                                                                                                                                                                                                                                                |                                                                                                                                               |                                                                                                                                                                                                                                                                                                                                                                                                                                                                                                                                                                    |
| EPI_ISL_467206 | Hospital General Universitario Gregorio Marañón                                                                                                                                                                                                                                                                | SeqCOVID-SPAIN consortium/IBV(CSIC)                                                                                                           | Darío García de Viedma and SeqCOVID-SPAIN consortium; Jon Sicilia; Julia Suárez; Laura Pérez-Lago; Marta Herranz; Patricia Muñoz; Pilar Catalán                                                                                                                                                                                                                                                                                                                                                                                                                    |
| EPI_ISL_467224 |                                                                                                                                                                                                                                                                                                                |                                                                                                                                               |                                                                                                                                                                                                                                                                                                                                                                                                                                                                                                                                                                    |
| EPI_ISL_428697 | Hospital Universitario 12 de Octubre                                                                                                                                                                                                                                                                           | Hospital Universitario 12 de Octubre                                                                                                          | Elias Dahdouh; Esther Viedma; Fernando Lázaro; Jesús Mingorance; Juan Carlos Galán; Julio García; Mª Dolores Folgueira; Natalia Stella; Rafael Cantón; Rafael Delgado; Raúl Recio; Sara González                                                                                                                                                                                                                                                                                                                                                                   |
| EPI_ISL_530006 |                                                                                                                                                                                                                                                                                                                |                                                                                                                                               |                                                                                                                                                                                                                                                                                                                                                                                                                                                                                                                                                                    |
| EPI_ISL_428674 | Hospital Universitario La Paz                                                                                                                                                                                                                                                                                  | Hospital Universitario 12 de Octubre                                                                                                          | Elias Dahdouh; Esther Viedma; Fernando Lázaro; Jesús Mingorance; Juan Carlos Galán; Julio García; Mª Dolores Folgueira; Natalia Stella; Rafael Cantón; Rafael Delgado; Raúl Recio; Sara González                                                                                                                                                                                                                                                                                                                                                                   |
| EPI_ISL_417975 | Hospital Universitario La Paz                                                                                                                                                                                                                                                                                  | Hospital Universitario La Paz                                                                                                                 | Elias Dahdouh; Esther Viedma; Fernando Lázaro; Jesús Mingorance; Juan Carlos Galán; Julio García; Mª Dolores Folgueira; Natalia Stella; Rafael Cantón; Rafael Delgado; Raúl Recio; Sara González                                                                                                                                                                                                                                                                                                                                                                   |
| EPI_ISL_530091 |                                                                                                                                                                                                                                                                                                                |                                                                                                                                               |                                                                                                                                                                                                                                                                                                                                                                                                                                                                                                                                                                    |
| EPI_ISL_455319 | Hospital Virgen de las Nieves                                                                                                                                                                                                                                                                                  | Instituto de Salud Carlos III                                                                                                                 | A. Monzón; F. Casas; I. Jiménez; Iglesias-Caballero; M. Camarero; M. Cuesta; M. González-Esguevillas; M. Molinero Calamita; M. Zaballos; P. Jiménez; S. Juliá; S. Pozo; S. Sanbonmatsu; S. Varona                                                                                                                                                                                                                                                                                                                                                                  |
| EPI_ISL_417486 | Hospital of Southern Norway - Kristiansand, Department of Medical                                                                                                                                                                                                                                              | Norwegian Institute of Public Health, Department of Virology                                                                                  | Hilde Elshaug; Hilde Vollan; Kamilla Heddeland Instefjord; Karoline Bragstad; Kathrine Stene-Johansen; Olav Hungnes; Rasmus Riis Kopperud                                                                                                                                                                                                                                                                                                                                                                                                                          |
| EPI_ISL_417487 | Microbiology                                                                                                                                                                                                                                                                                                   |                                                                                                                                               |                                                                                                                                                                                                                                                                                                                                                                                                                                                                                                                                                                    |
| EPI_ISL_420147 |                                                                                                                                                                                                                                                                                                                |                                                                                                                                               |                                                                                                                                                                                                                                                                                                                                                                                                                                                                                                                                                                    |
| EPI_ISL_471176 |                                                                                                                                                                                                                                                                                                                |                                                                                                                                               |                                                                                                                                                                                                                                                                                                                                                                                                                                                                                                                                                                    |
| EPI_ISL_590915 |                                                                                                                                                                                                                                                                                                                |                                                                                                                                               |                                                                                                                                                                                                                                                                                                                                                                                                                                                                                                                                                                    |
| EPI_ISL_645004 | EPI_ISL_645007, EPI_ISL_645008, EPI_ISL_645009, EPI_ISL_645011, EPI_ISL_645018, EPI_ISL_645019, EPI_ISL_645030, EPI_ISL_645036, EPI_ISL_645037, EPI_ISL_645042, EPI_ISL_645077                                                                                                                                 |                                                                                                                                               |                                                                                                                                                                                                                                                                                                                                                                                                                                                                                                                                                                    |
| see above      | Human Genome Variation Research Group, Malopolska Centre of Biotechnology                                                                                                                                                                                                                                      | Human Genome Variation Research Group, Malopolska Centre of Biotechnology                                                                     | Botwina, P.; Branicki, W.; Dabrowska, A.; Fomny, J.; Gromowski, T.; Klajmon, A.; Kopera, K.; Kowalski, M.; Labaj; Marszalek, K.; Owczarek, K.; P.P.; Pisarek, A.; Pospiech, E.; Pyrc, K.; Sanak, M.; Swadzba, J.; Szczepanski, A.                                                                                                                                                                                                                                                                                                                                  |
| EPI_ISL_526230 | Hungarian Defence Forces Military Medical Centre                                                                                                                                                                                                                                                               | National Laboratory of Virology, Szentágotthai Research Centre                                                                                | Balázs Somogyi; Bálint Eszenyi; Endre Gábor Tóth; Ferenc Jakab; Gábor Kemenesi                                                                                                                                                                                                                                                                                                                                                                                                                                                                                     |
| EPI_ISL_526232 |                                                                                                                                                                                                                                                                                                                |                                                                                                                                               |                                                                                                                                                                                                                                                                                                                                                                                                                                                                                                                                                                    |
| EPI_ISL_653815 | I.R.C.C.S. "S. De Bellis" - Ente Ospedaliero                                                                                                                                                                                                                                                                   | Istituto Zooprofilattico Sperimentale della Puglia e della Basilicata                                                                         | Bianco A.; Capozzi L.; Cipolletta D.; Del Sambro L.; Galante D.; Lippolis A.; Manzulli V; Notarnicola M.; Pace L.; Parisi A.; Rondinone V.                                                                                                                                                                                                                                                                                                                                                                                                                         |
| EPI_ISL_653816 |                                                                                                                                                                                                                                                                                                                |                                                                                                                                               |                                                                                                                                                                                                                                                                                                                                                                                                                                                                                                                                                                    |
| EPI_ISL_653817 |                                                                                                                                                                                                                                                                                                                |                                                                                                                                               |                                                                                                                                                                                                                                                                                                                                                                                                                                                                                                                                                                    |
| EPI_ISL_653818 |                                                                                                                                                                                                                                                                                                                |                                                                                                                                               |                                                                                                                                                                                                                                                                                                                                                                                                                                                                                                                                                                    |
| EPI_ISL_722870 |                                                                                                                                                                                                                                                                                                                |                                                                                                                                               |                                                                                                                                                                                                                                                                                                                                                                                                                                                                                                                                                                    |
| EPI_ISL_493328 | EPI_ISL_493329, EPI_ISL_493331, EPI_ISL_603137, EPI_ISL_603154, EPI_ISL_603155, EPI_ISL_603157, EPI_ISL_603158                                                                                                                                                                                                 |                                                                                                                                               |                                                                                                                                                                                                                                                                                                                                                                                                                                                                                                                                                                    |
| see above      | INMI Lazzaro Spallanzani IRCCS                                                                                                                                                                                                                                                                                 | INMI Lazzaro Spallanzani IRCCS                                                                                                                | Antonino Di Caro; Barbara Bartolini; Cesare E.M. Gruber; Emanuela Giombini; Francesco Messina; Fulvia Pimpinelli; Maria R. Capobianchi; Martina Rueca; Simone Lanini                                                                                                                                                                                                                                                                                                                                                                                               |
| EPI_ISL_410545 | EPI_ISL_410546, EPI_ISL_417921, EPI_ISL_417922, EPI_ISL_417923, EPI_ISL_419254, EPI_ISL_424342, EPI_ISL_424344                                                                                                                                                                                                 |                                                                                                                                               |                                                                                                                                                                                                                                                                                                                                                                                                                                                                                                                                                                    |
| see above      | INMI Lazzaro Spallanzani IRCCS                                                                                                                                                                                                                                                                                 | Laboratory of Virology, INMI Lazzaro Spallanzani IRCCS                                                                                        | Antonino Di Caro; Barbara Bartolini; Cesare E. M. Gruber; Cesare Ernesto Maria Gruber; Concetta Castilletti; Daniele Lapa; Eleonora Lalle; Emanuela Giombini; Emanuele Nicastrì; Fabrizio Carletti; Francesca Colavita; Francesco Messina; Francesco Vairo; Giulia Matusali; Giuseppe Ippolito; Giuseppe Ippolito.; Licia Bordin; Maria R. Capobianchi; Maria Rosaria Capobianchi; Martina Rueca                                                                                                                                                                   |
| EPI_ISL_453853 | INSA                                                                                                                                                                                                                                                                                                           | Instituto Nacional de Saude (INSA)                                                                                                            | Borges et al                                                                                                                                                                                                                                                                                                                                                                                                                                                                                                                                                       |
| EPI_ISL_453992 |                                                                                                                                                                                                                                                                                                                |                                                                                                                                               |                                                                                                                                                                                                                                                                                                                                                                                                                                                                                                                                                                    |
| EPI_ISL_494771 | INT Fondazione Pascale                                                                                                                                                                                                                                                                                         | INT Fondazione Pascale                                                                                                                        | INT Fondazione Pascale                                                                                                                                                                                                                                                                                                                                                                                                                                                                                                                                             |
| EPI_ISL_775259 |                                                                                                                                                                                                                                                                                                                |                                                                                                                                               |                                                                                                                                                                                                                                                                                                                                                                                                                                                                                                                                                                    |
| EPI_ISL_751352 | EPI_ISL_751357, EPI_ISL_751358, EPI_ISL_751361, EPI_ISL_751368, EPI_ISL_751372, EPI_ISL_751373, EPI_ISL_751374, EPI_ISL_751392, EPI_ISL_751398, EPI_ISL_751400, EPI_ISL_751406, EPI_ISL_751410, EPI_ISL_751411, EPI_ISL_751424, EPI_ISL_751426                                                                 |                                                                                                                                               |                                                                                                                                                                                                                                                                                                                                                                                                                                                                                                                                                                    |
| see above      | IRCCS Sacro Cuore Don Calabria Hospital, Department of Infectious, Tropical Diseases & Microbiology                                                                                                                                                                                                            | University of Verona, Department of Biotechnology                                                                                             | Antonio Mori; Chiara Degli Esposti; Chiara Piubelli; Cristina Beltrami; Elena Pomari; Emanuela Cosentino; Giulia Lopatriello; Luca Marcolungo; Massimo Delledonne; Michela Delana                                                                                                                                                                                                                                                                                                                                                                                  |
| EPI_ISL_417335 | Institut des Agents Infectieux (IAI), Hospices Civils de Lyon                                                                                                                                                                                                                                                  | CNR Virus des Infections Respiratoires - France SUD                                                                                           | Alexandre Gaymard; Antonin Bal; Bruno Lina; Carine Moustaud; Florence Morfin-Sherpa; Gregory Destras; Gwendolynne Burfin; Laurence Josset; Martine Valette; Maude Bouscambert-Duchamp; Raphaële Lamy; Solenne Brun                                                                                                                                                                                                                                                                                                                                                 |
| EPI_ISL_418432 |                                                                                                                                                                                                                                                                                                                |                                                                                                                                               |                                                                                                                                                                                                                                                                                                                                                                                                                                                                                                                                                                    |
| EPI_ISL_475828 | Institut für Virologie am Department für Hygiene, Mikrobiologie und Public Health                                                                                                                                                                                                                              | Bergthaler laboratory, CeMM Research Center for Molecular Medicine of the Austrian Academy of Sciences                                        | Adi Steinrigl; Alexander Lercher; Alexandra Popa; Andreas Bergthaler; Benedikt Agerer; Christian Paar; Christoph Bock; Daniela Schmid; Dorothee von Laer; Elisabeth Puchhammer-Stoeckl; Franz Allerberger; Gernot Walder; Gregor Hörmann; Guenter Weiss; Gunther Vogl; Henrique Colaco; Jakob-Wendelin Genger; Jan Laine; Judith Aberle; Kinga Rigler-Hohenwarter; Lukas Endler; Manfred Nairz; Mark Smyth; Martin Senekowitsch; Michael Schuster; Peter Hufnagl; Peter Obrist; Rainer Gattringer; Sabine Sussitz-Rack; Stephan Aberle; Thomas Penz; Wegene Borena |
| EPI_ISL_583866 | Institute for Laboratory Diagnostics and Microbiology, Klinikum Klagenfurt am Worthersee                                                                                                                                                                                                                       | Bergthaler laboratory, CeMM Research Center for Molecular Medicine of the Austrian Academy of Sciences                                        | Adi Steinrigl; Alexander Lercher; Alexandra Popa; Andreas Bergthaler; Benedikt Agerer; Christian Paar; Christoph Bock; Daniela Schmid; Dorothee von Laer; Elisabeth Puchhammer-Stoeckl; Franz Allerberger; Gernot Walder; Gregor Hörmann; Guenter Weiss; Gunther Vogl; Henrique Colaco; Jakob-Wendelin Genger; Jan Laine; Judith Aberle; Kinga Rigler-Hohenwarter; Lukas Endler; Manfred Nairz; Mark Smyth; Martin Senekowitsch; Michael Schuster; Peter Hufnagl; Peter Obrist; Rainer Gattringer; Sabine Sussitz-Rack; Stephan Aberle; Thomas Penz; Wegene Borena |
| EPI_ISL_583580 | Institute for Medical and Chemical Laboratory Diagnostics, Kepler Universitätsklinikum                                                                                                                                                                                                                         | Bergthaler laboratory, CeMM Research Center for Molecular Medicine of the Austrian Academy of Sciences                                        | Adi Steinrigl; Alexander Lercher; Alexandra Popa; Andreas Bergthaler; Benedikt Agerer; Christian Paar; Christoph Bock; Daniela Schmid; Dorothee von Laer; Elisabeth Puchhammer-Stoeckl; Franz Allerberger; Gernot Walder; Gregor Hörmann; Guenter Weiss; Gunther Vogl; Henrique Colaco; Jakob-Wendelin Genger; Jan Laine; Judith Aberle; Kinga Rigler-Hohenwarter; Lukas Endler; Manfred Nairz; Mark Smyth; Martin Senekowitsch; Michael Schuster; Peter Hufnagl; Peter Obrist; Rainer Gattringer; Sabine Sussitz-Rack; Stephan Aberle; Thomas Penz; Wegene Borena |
| EPI_ISL_602527 | Institute for Virology, University Hospital Essen                                                                                                                                                                                                                                                              | Center of Medical Microbiology, Virology, and Hospital Hygiene, University of Duesseldorf                                                     | Alexander Dilthey; Andreas Walker; Daniel Strelow; Jessica Nicolai; Jörg Tirm; Klaus Pfeffer; Lisanna Hülse; Malte Kohns Vasconcelos; Maximilian Damagnez; Nadine Lübke; Olympia E. Anastasiou; Tobias Wienenmann; Torsten Houwaart; Ulf Dittmer                                                                                                                                                                                                                                                                                                                   |
| EPI_ISL_420294 | EPI_ISL_420295, EPI_ISL_420541, EPI_ISL_635201, EPI_ISL_635206, EPI_ISL_635207, EPI_ISL_635208, EPI_ISL_635210, EPI_ISL_635213, EPI_ISL_635214, EPI_ISL_635242, EPI_ISL_635254, EPI_ISL_635258, EPI_ISL_635261, EPI_ISL_635266, EPI_ISL_635272, EPI_ISL_635283, EPI_ISL_635287, EPI_ISL_635288, EPI_ISL_635297 |                                                                                                                                               |                                                                                                                                                                                                                                                                                                                                                                                                                                                                                                                                                                    |
| see above      | Institute of Microbiology and Immunology, Faculty of Medicine, University of Ljubljana                                                                                                                                                                                                                         | Institute of Microbiology and Immunology, Faculty of Medicine, University of Ljubljana                                                        | Lucijan Skubic; Mario Poljak; Miša Korva; Samo Zakotnik; Tatjana Avšič - Županc; Tatjana Avšič - Županc; Tomaž Mark Zorec                                                                                                                                                                                                                                                                                                                                                                                                                                          |
| EPI_ISL_583481 | EPI_ISL_583482, EPI_ISL_583484, EPI_ISL_583486, EPI_ISL_583487, EPI_ISL_583488, EPI_ISL_718258, EPI_ISL_718259, EPI_ISL_718260, EPI_ISL_788980, EPI_ISL_788981, EPI_ISL_788982, EPI_ISL_831676                                                                                                                 |                                                                                                                                               |                                                                                                                                                                                                                                                                                                                                                                                                                                                                                                                                                                    |
| see above      | Institute of Virology, Biomedical Research Center of the Slovak Academy of Sciences, Bratislava                                                                                                                                                                                                                | Faculty of Natural Sciences, Comenius University, Bratislava                                                                                  | Boris Klempa; Broňa Brejová; Dominika Fričová; Edita Staroňová; Elena Tichá; Jozef Nosek; Juraj Kopáček; Kristína Boršová; Martina Ličková; Martina Neboháčová; Monika Sláviková; Sabina Fumačová Havilíková; Tomáš Vinař; Viktória Hodorová; Viktória Čabanová; Ľubomíra Lukáčiková                                                                                                                                                                                                                                                                               |
| EPI_ISL_417877 | Institute of Virology, Biomedical Research Center of the Slovak Academy of Sciences, Bratislava; Public Health Authority of the Slovak Republic, Bratislava                                                                                                                                                    | Institute of Virology, Biomedical Research Center of the Slovak Academy of Sciences, Bratislava; Comenius University Science Park, Bratislava | Boris Klempa; Diana Rušňáková; Edita Staroňová; Elena Tichá; Jaroslav Budiš; Juraj Kopáček; Juraj Kočí; Martina Ličková; Miroslav Böhrner; Monika Sláviková; Sabina Fumačová Havilíková; Tomáš Szemeš; Werner Krampfl                                                                                                                                                                                                                                                                                                                                              |
| EPI_ISL_417878 |                                                                                                                                                                                                                                                                                                                |                                                                                                                                               |                                                                                                                                                                                                                                                                                                                                                                                                                                                                                                                                                                    |
| EPI_ISL_417879 |                                                                                                                                                                                                                                                                                                                |                                                                                                                                               |                                                                                                                                                                                                                                                                                                                                                                                                                                                                                                                                                                    |
| EPI_ISL_417880 |                                                                                                                                                                                                                                                                                                                |                                                                                                                                               |                                                                                                                                                                                                                                                                                                                                                                                                                                                                                                                                                                    |
| EPI_ISL_477194 | Istituto Zooprofilattico Sperimentale Puglia e Basilicata;                                                                                                                                                                                                                                                     | Beaconlab (Bioinformatics, Evolution and Comparative Genomics lab), Dept of Biosciences, University on Mila                                   | Chiara M.; Manzari C.; Parisi A.; Pesole G.                                                                                                                                                                                                                                                                                                                                                                                                                                                                                                                        |
| EPI_ISL_477202 |                                                                                                                                                                                                                                                                                                                |                                                                                                                                               |                                                                                                                                                                                                                                                                                                                                                                                                                                                                                                                                                                    |
| EPI_ISL_477203 |                                                                                                                                                                                                                                                                                                                |                                                                                                                                               |                                                                                                                                                                                                                                                                                                                                                                                                                                                                                                                                                                    |
| EPI_ISL_477199 | Istituto Zooprofilattico Sperimentale Puglia e Basilicata;                                                                                                                                                                                                                                                     | Beaconlab (Bioinformatics, Evolution and Comparative Genomics lab), Dept of Biosciences, University on Milan                                  | Chiara M.; Manzari C.; Parisi A.; Pesole G.                                                                                                                                                                                                                                                                                                                                                                                                                                                                                                                        |
| EPI_ISL_477200 |                                                                                                                                                                                                                                                                                                                |                                                                                                                                               |                                                                                                                                                                                                                                                                                                                                                                                                                                                                                                                                                                    |
| EPI_ISL_469023 | EPI_ISL_525553, EPI_ISL_525556, EPI_ISL_525557, EPI_ISL_525566, EPI_ISL_525568, EPI_ISL_525572, EPI_ISL_525573, EPI_ISL_525574, EPI_ISL_527380                                                                                                                                                                 |                                                                                                                                               |                                                                                                                                                                                                                                                                                                                                                                                                                                                                                                                                                                    |
| see above      | Istituto Zooprofilattico Sperimentale Puglia e Basilicata; Dipartimento di Bioscienze, Biotecnologie e Biofarmaceutica dell'Università degli Studi di Bari "A.Moro"; Istituto di Biomembrane, Bioenergetica e Biotecnologie Molecolari del Consiglio Nazionale delle Ricerche di Bari                          | Beaconlab (Bioinformatics, Evolution and Comparative Genomics lab), Dept of Biosciences, University on Milan                                  | Chiara M; Manzari C.; Parisi A.; Pesole G.                                                                                                                                                                                                                                                                                                                                                                                                                                                                                                                         |
| EPI_ISL_778647 | EPI_ISL_778649, EPI_ISL_778657, EPI_ISL_778659, EPI_ISL_778660, EPI_ISL_778661, EPI_ISL_778673, EPI_ISL_778686, EPI_ISL_778689, EPI_ISL_778723, EPI_ISL_778726, EPI_ISL_833535, EPI_ISL_833537, EPI_ISL_833538, EPI_ISL_833544, EPI_ISL_833546, EPI_ISL_833547, EPI_ISL_833548                                 |                                                                                                                                               |                                                                                                                                                                                                                                                                                                                                                                                                                                                                                                                                                                    |

|                                                                                                                                                                                                                                                                                                                                |                                                                                                                                                                                |                                                                                                                                                   |                                                                                                                                                                                                                                                                                                                                                                                    |
|--------------------------------------------------------------------------------------------------------------------------------------------------------------------------------------------------------------------------------------------------------------------------------------------------------------------------------|--------------------------------------------------------------------------------------------------------------------------------------------------------------------------------|---------------------------------------------------------------------------------------------------------------------------------------------------|------------------------------------------------------------------------------------------------------------------------------------------------------------------------------------------------------------------------------------------------------------------------------------------------------------------------------------------------------------------------------------|
| see above                                                                                                                                                                                                                                                                                                                      | Istituto Zooprofilattico Sperimentale del Mezzogiorno                                                                                                                          | TIGEM                                                                                                                                             | Andrea Ballabio; Anna Manfredi; Antonio Grimaldi; Antonio Limone; Biancamaria Pierri; Chiara Colantuono; Davide Cacchiarelli.; Denise Di Concilio; Francesco Panariello; Lucio Di Filippo; Marcello Salvi; Maria Concetta Cuomo; Patrizia Annunziata; Pellegrino Cerino; Valentina Bouche                                                                                          |
| EPI_ISL_763069, EPI_ISL_763071, EPI_ISL_763072, EPI_ISL_763073, EPI_ISL_763094, EPI_ISL_763095, EPI_ISL_763096, EPI_ISL_763097, EPI_ISL_763098, EPI_ISL_763138, EPI_ISL_763318, EPI_ISL_763320, EPI_ISL_763322, EPI_ISL_763323, EPI_ISL_763324, EPI_ISL_763325, EPI_ISL_763326, EPI_ISL_763327, EPI_ISL_763328, EPI_ISL_763330 | see above                                                                                                                                                                      | Istituto Zooprofilattico Sperimentale dell' Umbria e delle Marche -Togo Rosati                                                                    | Istituto Superiore di Sanità                                                                                                                                                                                                                                                                                                                                                       |
| EPI_ISL_649189, EPI_ISL_653813, EPI_ISL_722873, EPI_ISL_722874, EPI_ISL_722876, EPI_ISL_722878, EPI_ISL_722879, EPI_ISL_722884, EPI_ISL_722885, EPI_ISL_722886, EPI_ISL_722887, EPI_ISL_722888, EPI_ISL_722889, EPI_ISL_722892, EPI_ISL_722901, EPI_ISL_722902, EPI_ISL_722904, EPI_ISL_722907, EPI_ISL_794745, EPI_ISL_794755 | see above                                                                                                                                                                      | Istituto Zooprofilattico Sperimentale della Puglia e della Basilicata                                                                             | Istituto Zooprofilattico Sperimentale della Puglia e della Basilicata                                                                                                                                                                                                                                                                                                              |
| EPI_ISL_632151, EPI_ISL_418982, EPI_ISL_420371, EPI_ISL_420375, EPI_ISL_420438                                                                                                                                                                                                                                                 |                                                                                                                                                                                | Jamaica Hospital Medical Center                                                                                                                   | New York City Public Health Laboratory                                                                                                                                                                                                                                                                                                                                             |
| EPI_ISL_458202, EPI_ISL_462186                                                                                                                                                                                                                                                                                                 |                                                                                                                                                                                | KU Leuven, Clinical and Epidemiological Virology                                                                                                  | KU Leuven, Clinical and Epidemiological Virology                                                                                                                                                                                                                                                                                                                                   |
| EPI_ISL_444488                                                                                                                                                                                                                                                                                                                 |                                                                                                                                                                                | KU Leuven, Rega Institute, Clinical and Epidemiological Virology                                                                                  | KU Leuven, Rega Institute, Clinical and Epidemiological Virology                                                                                                                                                                                                                                                                                                                   |
| EPI_ISL_475561                                                                                                                                                                                                                                                                                                                 |                                                                                                                                                                                | Karolinska Universitetslaboriet                                                                                                                   | CTMR, Karolinska Institutet, Stockholm, Sweden                                                                                                                                                                                                                                                                                                                                     |
| EPI_ISL_424703, EPI_ISL_428201, EPI_ISL_549176                                                                                                                                                                                                                                                                                 |                                                                                                                                                                                | Karolinska Universitetslaboriet                                                                                                                   | The Public Health Agency of Sweden                                                                                                                                                                                                                                                                                                                                                 |
| EPI_ISL_475569, EPI_ISL_498226                                                                                                                                                                                                                                                                                                 |                                                                                                                                                                                | Klinisk mikrobiologi, Region Västerbotten                                                                                                         | Unit for Biological Agents, Department for CBRN Defence and Security, Swedish Defence Research Agency                                                                                                                                                                                                                                                                              |
| EPI_ISL_425053                                                                                                                                                                                                                                                                                                                 |                                                                                                                                                                                | Kungsholmsdoktorn LIC                                                                                                                             | The Public Health Agency of Sweden                                                                                                                                                                                                                                                                                                                                                 |
|                                                                                                                                                                                                                                                                                                                                |                                                                                                                                                                                | Lab voor klinische biologie                                                                                                                       | Onderzoeksgroep Virologie                                                                                                                                                                                                                                                                                                                                                          |
| EPI_ISL_421741, EPI_ISL_421752, EPI_ISL_421753, EPI_ISL_421754, EPI_ISL_421759, EPI_ISL_428945, EPI_ISL_428949, EPI_ISL_429733, EPI_ISL_429735, EPI_ISL_429759, EPI_ISL_429770, EPI_ISL_429778                                                                                                                                 |                                                                                                                                                                                | LIC                                                                                                                                               | LIC                                                                                                                                                                                                                                                                                                                                                                                |
| see above                                                                                                                                                                                                                                                                                                                      | Laboratoire National de Sante, Microbiology, Virology                                                                                                                          | Laboratoire National de Sante, Microbiology, Epidemiology and Microbial Genomics                                                                  | Basiel Cole; Bruno Verhasselt; Hans Nauwynck; Laurens Lambrechts; Linos Vandekerckhove; Marthe Pauwels; Nick Vereecke; Sebastiaan Theuns                                                                                                                                                                                                                                           |
| EPI_ISL_413593                                                                                                                                                                                                                                                                                                                 | Laboratoire National de Santé                                                                                                                                                  | Erasmus Medical Center                                                                                                                            | Anke Wienecke-Baldacchino; Ardasha1 Latsuzbaia; Catherine Ragimbeau; Guillaume Fournier; Jessica Tapp; Joel Mossong; Tamir Abdelrahman; Trung Nguyen Nguyen                                                                                                                                                                                                                        |
| EPI_ISL_419568, EPI_ISL_419582, EPI_ISL_419588                                                                                                                                                                                                                                                                                 | Laboratoire National de Santé, Microbiology, Virology                                                                                                                          | Laboratoire National de Santé, Microbiology, Epidemiology and Microbial Genomics                                                                  | Anne van der Linden; Annemiek van der Eijk; Bas Oude Munnink; Claudia Schapendonk; Corine GeurtsvanKessel; David Nieuwenhuijsen; G. Fournier; Irina Chestakova; J. Mossong; Jeroen van Kampen; Jolanda Voermans; Marion Koopmans; Mark Pronk; Pascal Lexmond; Reina Sikkema; Richard Molenkamp; T. Abdelrahman; T. Nguyen; on behalf of the Dutch national COVID-19 response team. |
| EPI_ISL_417528                                                                                                                                                                                                                                                                                                                 | Laboratoire Nationale de Santé, Microbiology, Virology                                                                                                                         | Laboratoire Nationale de Santé, Microbiology, Epidemiology and Microbial Genomics                                                                 | Anke Wienecke-Baldacchino; Ardasha1 Latsuzbaia; Catherine Ragimbeau; Guillaume Fournier; Jessica Tapp; Joel Mossong; Tamir Abdelrahman; Trung Nguyen Nguyen                                                                                                                                                                                                                        |
| EPI_ISL_548206, EPI_ISL_666672                                                                                                                                                                                                                                                                                                 | Laboratoire de Virologie, HUG                                                                                                                                                  | Swiss National Reference Centre for Influenza                                                                                                     | LAUBSCHER F.                                                                                                                                                                                                                                                                                                                                                                       |
| EPI_ISL_740242, EPI_ISL_744233, EPI_ISL_744429, EPI_ISL_744843                                                                                                                                                                                                                                                                 | Laboratoire du Centre Hospitalier Annecy Genevois                                                                                                                              | CNR Virus des Infections Respiratoires - France SUD                                                                                               | Antonin Bai; Bruno Chanzy; Bruno Lina; Gregory Destras; Gwendolynne Burfin; Hadrien Règue; Hélène Petitprez; Laurence Josset; Martine Valette; Quentin Semanas                                                                                                                                                                                                                     |
| EPI_ISL_458085                                                                                                                                                                                                                                                                                                                 | Laboratoire national de santé, Microbiology, Virology                                                                                                                          | Laboratoire national de santé, Microbiology, Microbial Genomics Platform                                                                          | Anke Wienecke-Baldacchino; Catherine Ragimbeau; Fatu Djabi; Jessica Tapp; Lise Pignon; Raoul Salmon; Tamir Abdelrahman                                                                                                                                                                                                                                                             |
| EPI_ISL_458085                                                                                                                                                                                                                                                                                                                 | Laboratorio Biologia Molecolare Sars Cov2 - UOC Laboratorio Analisi - Servizio Medicina di Laboratorio , Ospedale "San Francesco" - ATS- ASSL Nuoro                            | Laboratorio specialistico UOC Ematologia - Ospedale "San Francesco" - ATS-ASSL Nuoro                                                              | Asproni Rosanna; Casu Gavino; Fancello Tatiana; Fiamma Maura; Floris Anna Rita; Lo Maglio Iana; Mameli Giuseppe.; Monne Maria Itria; Palmas Angelo Domenico; Piras Giovanna; Sanna Filomena; Sulis Vincenzo; Toja Alessandro                                                                                                                                                       |
| EPI_ISL_458084                                                                                                                                                                                                                                                                                                                 | Laboratorio Biologia Molecolare Sars Cov2 - UOC Laboratorio Analisi - Servizio Medicina di Laboratorio, Ospedale "San Francesco" - ATS-ASSL Nuoro                              | Laboratorio specialistico UOC Ematologia - Ospedale "San Francesco" - ATS-ASSL Nuoro                                                              | Asproni Rosanna; Casu Gavino; Fancello Tatiana; Fiamma Maura; Floris Anna Rita; Lo Maglio Iana; Mameli Giuseppe.; Monne Maria Itria; Palmas Angelo Domenico; Piras Giovanna; Sanna Filomena; Sulis Vincenzo; Toja Alessandro                                                                                                                                                       |
| EPI_ISL_613706, EPI_ISL_613953, EPI_ISL_613955, EPI_ISL_614396, EPI_ISL_614397, EPI_ISL_614398, EPI_ISL_614889, EPI_ISL_637108, EPI_ISL_637109                                                                                                                                                                                 | see above                                                                                                                                                                      | Laboratorio Biologia Molecolare Sars Cov2 - UOC Laboratorio Analisi - Servizio Medicina di Laboratorio, Ospedale "San Francesco" - ATS-ASSL Nuoro | Asproni Rosanna; Casu Gavino; Fancello Tatiana; Fiamma Maura; Floris Anna Rita; Lo Maglio Iana; Mameli Giuseppe; Monne Maria Itria; Palmas Angelo Domenico; Piras Giovanna; Sanna Filomena; Sulis Vincenzo; Toja Alessandro                                                                                                                                                        |
| EPI_ISL_613560                                                                                                                                                                                                                                                                                                                 | Laboratorio Biologia Molecolare Sars Cov2 - UOC Laboratorio Analisi - Servizio Medicina di Laboratorio, Ospedale "San Francesco" - ATS-ASSL Nuoro Via Mannironi 1, 08100 Nuoro | Laboratorio specialistico UOC Ematologia - Ospedale "San Francesco" - ATS-ASSL Nuoro Nuoro                                                        | Asproni Rosanna; Casu Gavino; Fancello Tatiana; Fiamma Maura; Floris Anna Rita; Lo Maglio Iana; Mameli Giuseppe; Monne Maria Itria; Palmas Angelo Domenico; Piras Giovanna; Sanna Filomena; Sulis Vincenzo; Toja Alessandro                                                                                                                                                        |
| EPI_ISL_796130                                                                                                                                                                                                                                                                                                                 | Laboratorio de Microbiología. Hospital General Universitario de Elda, Alicante                                                                                                 | SeqCOVID-SPAIN consortium/IBV(CSIC)                                                                                                               | Cristina Torregrosa Hetland; Eva Pastor Boix; Mª Isabel Gascón Ros; Paloma Cascales Ramos and SeqCOVID-SPAIN consortium                                                                                                                                                                                                                                                            |
| EPI_ISL_582692, EPI_ISL_582693, EPI_ISL_582694, EPI_ISL_582767, EPI_ISL_582769, EPI_ISL_582810, EPI_ISL_582811, EPI_ISL_582833, EPI_ISL_582842, EPI_ISL_582845, EPI_ISL_582847, EPI_ISL_582848, EPI_ISL_582849, EPI_ISL_582850                                                                                                 | see above                                                                                                                                                                      | Laboratorio di Riferimento Regionale della Sicilia Occidentale per l'Emergenza COVID-19                                                           | Lo Presti Alessandra; Maida Carmelo Massimo; Mazzucco Walter; Pulvirenti Claudio; Purpari Giuseppe; Reale Stefano; Rezza Giovanni; Scibetta Silvia; Stefanelli Paola; Tramuto Fabio; Vitale Fabrizio; Vitale Francesco; Zichichi Salvatore                                                                                                                                         |
| EPI_ISL_710503                                                                                                                                                                                                                                                                                                                 | Laboratorio specialistico UOC Ematologia - Ospedale "San Francesco" - ATS-ASSL Nuoro                                                                                           | Laboratorio specialistico UOC Ematologia - Ospedale "San Francesco" - ATS-ASSL Nuoro                                                              | Giovanna Piras                                                                                                                                                                                                                                                                                                                                                                     |
| EPI_ISL_514426, EPI_ISL_779709, EPI_ISL_779712, EPI_ISL_779714                                                                                                                                                                                                                                                                 | Laboratory Diagnostic, Veterinary Specialized Institute Kraljevo                                                                                                               | Laboratory Diagnostic, Veterinary Specialized Institute Kraljevo                                                                                  | Afonso, C.; Banovic Djeri, B.; Jankovic, M.; Knezevic, A.; Petrovic, T.; Sekler, M.; Tesovic, B.; Vidanovic, D.; Volkening, J.                                                                                                                                                                                                                                                     |
| EPI_ISL_434459, EPI_ISL_434462, EPI_ISL_434466, EPI_ISL_434471, EPI_ISL_434475, EPI_ISL_434481, EPI_ISL_434483, EPI_ISL_437877, EPI_ISL_437881, EPI_ISL_437884, EPI_ISL_437892, EPI_ISL_437894, EPI_ISL_437895, EPI_ISL_437899, EPI_ISL_437903, EPI_ISL_437909, EPI_ISL_437910, EPI_ISL_437911                                 | Laboratory of Infectious Diseases, Department of Biomedical and Clinical Sciences L. Sacco, University of Milan                                                                | Laboratory of Infectious Diseases, Department of Biomedical and Clinical Sciences L. Sacco, University of Milan                                   | Alessia Lai; Annalisa Bergna; Carla Della Ventura; Claudia Balotta; Gianguglielmo Zehender on behalf of SARS-CoV-2 ITALIAN RESEARCH ENTERPRISE-(SCIRE) Collaborative Group; Massimo Galli                                                                                                                                                                                          |
| see above                                                                                                                                                                                                                                                                                                                      | Laboratory of Microbiology, Medical School, National and Kapodistrian University of Athens                                                                                     | Laboratory of Biology, Department of Medicine, Democritus University of Thrace                                                                    | Bampali, M.; Dovrolis, N.; Froukala, E.; Gatzidou, E.; Kassela K.; N. and Karakasilotis, I.; Spanakis; Stavropoulou, A.; Tsakris, A.; Velezta, S.                                                                                                                                                                                                                                  |
| EPI_ISL_417419                                                                                                                                                                                                                                                                                                                 | Laboratory of Molecular Virology International Center for Genetic Engineering and Biotechnology (ICGEB)                                                                        | ARGO Open Lab Platform for Genome sequencing                                                                                                      | D'Agaro P; Dal Monego S; Licastro D; Marcello A; Rajasekharan S; Segat L                                                                                                                                                                                                                                                                                                           |
| EPI_ISL_479616, EPI_ISL_479617, EPI_ISL_479618, EPI_ISL_479619, EPI_ISL_525495, EPI_ISL_525496                                                                                                                                                                                                                                 | Laboratory of Molecular Virology of the International Centre for Genetic Engineering and Biotechnology (ICGEB)                                                                 | ARGO Open Lab Platform for Genome Sequencing                                                                                                      | Confalonieri M; Confalonieri M Marcello A; Confalonieri P; D; D'Agaro P; Dal Monego S; Licastro; Licastro D; Marcello A; Rajasekharan S; Salton F; Segat L                                                                                                                                                                                                                         |
| EPI_ISL_451298, EPI_ISL_451300, EPI_ISL_451301, EPI_ISL_451302                                                                                                                                                                                                                                                                 | Laboratory of Virology, INMI Lazzaro Spallanzani IRCCS                                                                                                                         | Laboratory of Virology, INMI Lazzaro Spallanzani IRCCS                                                                                            | Antonino Di Caro; Barbara Bartolini; Cesare E.M. Gruber; Francesco Messina; Giuseppe Ippolito; Maria R. Capobianchi; Martina Rueca                                                                                                                                                                                                                                                 |
| EPI_ISL_576117, EPI_ISL_576118, EPI_ISL_576120, EPI_ISL_576121, EPI_ISL_576125                                                                                                                                                                                                                                                 | Laboratory, The Bio Arte Limited                                                                                                                                               | Laboratory, The Bio Arte Limited                                                                                                                  | Biazzo, M.; Madeddu, S.; Pinzauti, D.; Santoro, F.                                                                                                                                                                                                                                                                                                                                 |
| EPI_ISL_656608, EPI_ISL_675164, EPI_ISL_702813, EPI_ISL_711028, EPI_ISL_760293, EPI_ISL_821288, EPI_ISL_834935                                                                                                                                                                                                                 | see above                                                                                                                                                                      | Lighthouse Lab in Alderley Park                                                                                                                   | Wellcome Sanger Institute for the COVID-19 Genomics UK (COG-UK) Consortium                                                                                                                                                                                                                                                                                                         |
| EPI_ISL_557815, EPI_ISL_605975                                                                                                                                                                                                                                                                                                 | Lighthouse Lab in Alderley Park                                                                                                                                                | Wellcome Sanger Institute for the COVID-19 Genomics UK (COG-UK) consortium                                                                        | Cordelia Langford; David K. Jackson; Dominic Kwiatkowski; Ewan Harrison; Ian Johnston; Jacquelyn Wynn; John Sillitoe on behalf of the Wellcome Sanger Institute COVID-19 Surveillance Team; Mairead Hyland; Roberto Amato; Sonia Goncalves; The Lighthouse Lab in Alderley Park and Alex Alderton                                                                                  |
| EPI_ISL_673394, EPI_ISL_704689                                                                                                                                                                                                                                                                                                 | Lighthouse Lab in Cambridge                                                                                                                                                    | Wellcome Sanger Institute for the COVID-19 Genomics UK (COG-UK) Consortium                                                                        | Cordelia Langford; David K. Jackson; Dominic Kwiatkowski; Ewan Harrison; Ian Johnston; John Sillitoe on behalf of the Wellcome Sanger Institute COVID-19 Surveillance Team; Rob Howes; Roberto Amato; Sonia Goncalves; The Lighthouse Lab in Cambridge and Alex Alderton                                                                                                           |
| EPI_ISL_703975,                                                                                                                                                                                                                                                                                                                | Lighthouse Lab in Glasgow                                                                                                                                                      | Wellcome Sanger Institute for the COVID-19 Genomics UK (COG-UK)                                                                                   | Anna Dominiczak and Alex Alderton; Carol Clugston; Cordelia Langford; David Gray; David K. Jackson; Dominic Kwiatkowski; Ewan Harrison; Harper VanSteenhouse; Ian Johnston; John Sillitoe on behalf of the Wellcome Sanger                                                                                                                                                         |

|                                                                                                                                                                                                                                                                                                                                                                                                                                                                                                                                                                                                                                                                                                                                                                                                                                                                                                                                                                                                                                                                                                                                                                                                                                                                                                                                                                                                                |                                                                                                                                                                                                                |                                                                                                                              |                                                                                                                                                                                                                                                                                                                                                                                                                                                                                                                                                                                                                                                                                                            |                                                                                                                                                                                                                                                                                       |
|----------------------------------------------------------------------------------------------------------------------------------------------------------------------------------------------------------------------------------------------------------------------------------------------------------------------------------------------------------------------------------------------------------------------------------------------------------------------------------------------------------------------------------------------------------------------------------------------------------------------------------------------------------------------------------------------------------------------------------------------------------------------------------------------------------------------------------------------------------------------------------------------------------------------------------------------------------------------------------------------------------------------------------------------------------------------------------------------------------------------------------------------------------------------------------------------------------------------------------------------------------------------------------------------------------------------------------------------------------------------------------------------------------------|----------------------------------------------------------------------------------------------------------------------------------------------------------------------------------------------------------------|------------------------------------------------------------------------------------------------------------------------------|------------------------------------------------------------------------------------------------------------------------------------------------------------------------------------------------------------------------------------------------------------------------------------------------------------------------------------------------------------------------------------------------------------------------------------------------------------------------------------------------------------------------------------------------------------------------------------------------------------------------------------------------------------------------------------------------------------|---------------------------------------------------------------------------------------------------------------------------------------------------------------------------------------------------------------------------------------------------------------------------------------|
| EPI_ISL_709811, EPI_ISL_778159, EPI_ISL_799176, EPI_ISL_799189, EPI_ISL_800666                                                                                                                                                                                                                                                                                                                                                                                                                                                                                                                                                                                                                                                                                                                                                                                                                                                                                                                                                                                                                                                                                                                                                                                                                                                                                                                                 | Consortium                                                                                                                                                                                                     |                                                                                                                              | Institute COVID-19 Surveillance Team; Roberto Amato; Sonia Goncalves; Yumi Kasai                                                                                                                                                                                                                                                                                                                                                                                                                                                                                                                                                                                                                           |                                                                                                                                                                                                                                                                                       |
| EPI_ISL_590271, EPI_ISL_590443, EPI_ISL_590457, EPI_ISL_590489, EPI_ISL_590594, EPI_ISL_590667, EPI_ISL_600813                                                                                                                                                                                                                                                                                                                                                                                                                                                                                                                                                                                                                                                                                                                                                                                                                                                                                                                                                                                                                                                                                                                                                                                                                                                                                                 |                                                                                                                                                                                                                |                                                                                                                              |                                                                                                                                                                                                                                                                                                                                                                                                                                                                                                                                                                                                                                                                                                            |                                                                                                                                                                                                                                                                                       |
| see above                                                                                                                                                                                                                                                                                                                                                                                                                                                                                                                                                                                                                                                                                                                                                                                                                                                                                                                                                                                                                                                                                                                                                                                                                                                                                                                                                                                                      | Lighthouse Lab in Glasgow                                                                                                                                                                                      | Wellcome Sanger Institute for the COVID-19 Genomics UK (COG-UK) consortium                                                   | Anna Dominiczak and Alex Alderton; Carol Clugston; Cordelia Langford; David Gray; David K. Jackson; Dominic Kwiatkowski; Ewan Harrison; Harper VanSteenhouse; Ian Johnston; John Sillitoe on behalf of the Wellcome Sanger Institute COVID-19 Surveillance Team (http://www.sanger.ac.uk/covid-team); Roberto Amato; Sonia Goncalves; Yumi Kasai                                                                                                                                                                                                                                                                                                                                                           |                                                                                                                                                                                                                                                                                       |
| EPI_ISL_673814, EPI_ISL_720236                                                                                                                                                                                                                                                                                                                                                                                                                                                                                                                                                                                                                                                                                                                                                                                                                                                                                                                                                                                                                                                                                                                                                                                                                                                                                                                                                                                 | Lighthouse Lab in Milton Keynes                                                                                                                                                                                | Wellcome Sanger Institute for the COVID-19 Genomics UK (COG-UK) Consortium                                                   | Cordelia Langford; David K. Jackson; Dominic Kwiatkowski; Ewan Harrison; Ian Johnston; John Sillitoe on behalf of the Wellcome Sanger Institute COVID-19 Surveillance Team; Roberto Amato; Sonia Goncalves; The Lighthouse Lab in Milton Keynes and Alex Alderton                                                                                                                                                                                                                                                                                                                                                                                                                                          |                                                                                                                                                                                                                                                                                       |
| EPI_ISL_559049, EPI_ISL_601762                                                                                                                                                                                                                                                                                                                                                                                                                                                                                                                                                                                                                                                                                                                                                                                                                                                                                                                                                                                                                                                                                                                                                                                                                                                                                                                                                                                 | Lighthouse Lab in Milton Keynes                                                                                                                                                                                | Wellcome Sanger Institute for the COVID-19 Genomics UK (COG-UK) consortium                                                   | Cordelia Langford; David K. Jackson; Dominic Kwiatkowski; Ewan Harrison; Ian Johnston; John Sillitoe on behalf of the Wellcome Sanger Institute COVID-19 Surveillance Team; John Sillitoe on behalf of the Wellcome Sanger Institute COVID-19 Surveillance Team (http://www.sanger.ac.uk/covid-team); Roberto Amato; Sonia Goncalves; The Lighthouse Lab in Alderley Park and Alex Alderton; The Lighthouse Lab in Milton Keynes and Alex Alderton                                                                                                                                                                                                                                                         |                                                                                                                                                                                                                                                                                       |
| EPI_ISL_541847, EPI_ISL_541848, EPI_ISL_541849, EPI_ISL_541850, EPI_ISL_541851, EPI_ISL_541852, EPI_ISL_541853, EPI_ISL_541854, EPI_ISL_541855, EPI_ISL_541856, EPI_ISL_541858, EPI_ISL_541859, EPI_ISL_541861, EPI_ISL_541862, EPI_ISL_541863, EPI_ISL_541864, EPI_ISL_541865                                                                                                                                                                                                                                                                                                                                                                                                                                                                                                                                                                                                                                                                                                                                                                                                                                                                                                                                                                                                                                                                                                                                 | see above                                                                                                                                                                                                      | Lithuanian University of Health Sciences Hospital, Department of Laboratory Medicine                                         | Arnoldas Pautienius; Astra Vitkauskiene; Dovydas Gecys; Kamile Tamausauskaite; Laura Pareckaitė; Lukas Zemaitis; Vaiva Lesauskaite                                                                                                                                                                                                                                                                                                                                                                                                                                                                                                                                                                         |                                                                                                                                                                                                                                                                                       |
| EPI_ISL_536398                                                                                                                                                                                                                                                                                                                                                                                                                                                                                                                                                                                                                                                                                                                                                                                                                                                                                                                                                                                                                                                                                                                                                                                                                                                                                                                                                                                                 | Lithuanian University of Health Sciences Hospital, Department of Laboratory Medicine                                                                                                                           | Lithuanian University of Health Sciences, Laboratory of Molecular Cardiology                                                 |                                                                                                                                                                                                                                                                                                                                                                                                                                                                                                                                                                                                                                                                                                            |                                                                                                                                                                                                                                                                                       |
|                                                                                                                                                                                                                                                                                                                                                                                                                                                                                                                                                                                                                                                                                                                                                                                                                                                                                                                                                                                                                                                                                                                                                                                                                                                                                                                                                                                                                |                                                                                                                                                                                                                | Lithuanian University of Health Sciences, Molecular cardiology lab.                                                          | Arnoldas Pautienius; Astra Vitkauskiene; Dovydas Gecys; Kamile Tamausauskaite; Lukas Zemaitis; Vaiva Lesauskaite                                                                                                                                                                                                                                                                                                                                                                                                                                                                                                                                                                                           |                                                                                                                                                                                                                                                                                       |
| EPI_ISL_500056, EPI_ISL_500109, EPI_ISL_705813, EPI_ISL_838458                                                                                                                                                                                                                                                                                                                                                                                                                                                                                                                                                                                                                                                                                                                                                                                                                                                                                                                                                                                                                                                                                                                                                                                                                                                                                                                                                 | Liverpool Clinical Laboratories                                                                                                                                                                                | COVID-19 Genomics UK (COG-UK) Consortium                                                                                     | A Alrezaihi; Alessandro Gerada; Alistair Darby; Angela Cowell; Anita Lucaci; Anu Chawla; Cassie Olateji; Catherine Hartley; Charlotte Nelson; Ecaterina Vamos; Elaine O'Toole; Eleanor G Bentley; Ghada T Shawli; Isabel Garcia-Dorival; James Johnson; James P Stewart; Jenifer Manson; Joanne Watts; Jones Benjamin; Jordan J Clark; Julian Hiscox; L Luu; Lucille Rainbow; M Almsaud; Margaret Hughes; Mark Whitehead; Matthew Gemmell; Miren Iurriza-Gomara; Muhanad Alruwaili; N.P Randle; Neil Swainston; PKF Gilmore; Parul Sharma; Rebekah Penrice-Randal; Richard Eccles; Richard Gregory; Sam Haldenby; Steve Paterson; Stuart D Armstrong; Trevor Ian Robinson; Ximeng Han                      |                                                                                                                                                                                                                                                                                       |
| EPI_ISL_413580                                                                                                                                                                                                                                                                                                                                                                                                                                                                                                                                                                                                                                                                                                                                                                                                                                                                                                                                                                                                                                                                                                                                                                                                                                                                                                                                                                                                 | MHC Hart voor Brabant                                                                                                                                                                                          | Erasmus Medical Center                                                                                                       | Anne van der Linden; Anнемiek van der Eijk; Aura Timen; Bas Oude Munnink; Claudia Schapendonk; Corien Swaan; Corine GeurtsvanKessel; David Nieuwenhuijse; Irina Chestakova; Jeroen van Kampen; Jolanda Voermans; Madelif Molters; Manon Haverkate; Marion Koopmans; Mark Pronk; Mart Stein; Pascal Lexmond; Reina Sikkena; Richard Molenkamp; Sandra Kengne Kamga Mobou; on behalf of the Dutch national COVID-19 response team.                                                                                                                                                                                                                                                                           |                                                                                                                                                                                                                                                                                       |
| EPI_ISL_413590                                                                                                                                                                                                                                                                                                                                                                                                                                                                                                                                                                                                                                                                                                                                                                                                                                                                                                                                                                                                                                                                                                                                                                                                                                                                                                                                                                                                 | MHC Utrecht                                                                                                                                                                                                    | Erasmus Medical Center                                                                                                       | Anne van der Linden; Anнемiek van der Eijk; Aura Timen; Bas Oude Munnink; Claudia Schapendonk; Corien Swaan; Corine GeurtsvanKessel; David Nieuwenhuijse; Irina Chestakova; Jeroen van Kampen; Jolanda Voermans; Madelif Molters; Manon Haverkate; Marion Koopmans; Mark Pronk; Mart Stein; Pascal Lexmond; Reina Sikkena; Richard Molenkamp; Sandra Kengne Kamga Mobou; on behalf of the Dutch national COVID-19 response team.                                                                                                                                                                                                                                                                           |                                                                                                                                                                                                                                                                                       |
| EPI_ISL_631301, EPI_ISL_513493                                                                                                                                                                                                                                                                                                                                                                                                                                                                                                                                                                                                                                                                                                                                                                                                                                                                                                                                                                                                                                                                                                                                                                                                                                                                                                                                                                                 | MVZ DIAMEDIS Diagnostische Medizin Sennestadt GmbH<br>Maine HETL                                                                                                                                               | Bielefeld University<br>Tewhey Lab, The Jackson Laboratory                                                                   | Alexander Sczyrba; Christiane Scherer; David Brandt; Jörn Kalinowski; Levin-Joe Klages; Marina Simunovic; Markus Haak; Svenja Vinke; Tobias Busche<br>Barter, M.; Dewey, H.; H. and Tewhey, R.; Lynch, R.; Matluk, N.; Munger                                                                                                                                                                                                                                                                                                                                                                                                                                                                              |                                                                                                                                                                                                                                                                                       |
| EPI_ISL_1064026, EPI_ISL_1064033, EPI_ISL_1064034, EPI_ISL_1064035, EPI_ISL_1064036, EPI_ISL_1064037, EPI_ISL_1064039, EPI_ISL_1064040, EPI_ISL_1064041, EPI_ISL_1064042, EPI_ISL_1064044, EPI_ISL_1064045, EPI_ISL_1064046, EPI_ISL_1064047, EPI_ISL_1064048, EPI_ISL_1064049, EPI_ISL_1064050, EPI_ISL_1064051, EPI_ISL_1064052, EPI_ISL_1064053, EPI_ISL_1064054, EPI_ISL_1064055, EPI_ISL_1064056, EPI_ISL_1064057, EPI_ISL_1064058, EPI_ISL_1064059, EPI_ISL_1064060, EPI_ISL_1064061, EPI_ISL_1064062, EPI_ISL_1064063, EPI_ISL_1064064, EPI_ISL_1064065, EPI_ISL_1064066, EPI_ISL_1064067, EPI_ISL_1064068, EPI_ISL_1064069, EPI_ISL_1064070, EPI_ISL_1064071, EPI_ISL_1064072, EPI_ISL_1064073, EPI_ISL_1064074, EPI_ISL_1064075, EPI_ISL_1064078, EPI_ISL_1064079, EPI_ISL_1064080, EPI_ISL_1064081, EPI_ISL_1064082, EPI_ISL_1064083, EPI_ISL_1064084, EPI_ISL_1064085, EPI_ISL_1064086, EPI_ISL_1064087, EPI_ISL_1064088, EPI_ISL_1064089, EPI_ISL_1064091, EPI_ISL_1064092, EPI_ISL_1064093, EPI_ISL_1064094, EPI_ISL_1064095, EPI_ISL_1064096, EPI_ISL_1064097, EPI_ISL_1064098, EPI_ISL_1064099, EPI_ISL_1064100, EPI_ISL_1064101, EPI_ISL_1064102, EPI_ISL_1064103, EPI_ISL_1064104, EPI_ISL_1064105, EPI_ISL_1064106, EPI_ISL_1064107, EPI_ISL_1064108, EPI_ISL_1064109, EPI_ISL_1064110, EPI_ISL_1064111, EPI_ISL_1064112, EPI_ISL_1064113, EPI_ISL_1064114, EPI_ISL_1064115, EPI_ISL_1064116 | see above                                                                                                                                                                                                      | Microbiology and Virology Unit, Azienda Ospedale Padova, Padova, Italy                                                       | Department of Molecular Medicine, Computational Medicine Group, Univeresity of Padova, Padova, Italy                                                                                                                                                                                                                                                                                                                                                                                                                                                                                                                                                                                                       | Andrea Crisanti; Andrea Spitaleri; Claudia Del Vecchio; Daniela Maria Cirillo; Dejan Lazarevic; Elisa Franchini; Enrico Lavezzo; Fabio Simeoni; Federico Bianca; Francesca Saluzzo; Francesco Onelia; Giovanni Lorenzini; Giovanni Toton; Laura Manuto; Marco Grazioli; Stefano Toppo |
| EPI_ISL_738147, EPI_ISL_738194, EPI_ISL_738243                                                                                                                                                                                                                                                                                                                                                                                                                                                                                                                                                                                                                                                                                                                                                                                                                                                                                                                                                                                                                                                                                                                                                                                                                                                                                                                                                                 | Microbiology and Virology Unit, Florence Careggi University Hospital                                                                                                                                           | Microbiology and Virology Unit, Florence Careggi University Hospital                                                         | Alberto Antonelli; Gian Maria Rossolini; Marco Coppi; Simona Pollini; Vincenzo Di Pilato                                                                                                                                                                                                                                                                                                                                                                                                                                                                                                                                                                                                                   |                                                                                                                                                                                                                                                                                       |
| EPI_ISL_1181734, EPI_ISL_1181742, EPI_ISL_1181752, EPI_ISL_1181765                                                                                                                                                                                                                                                                                                                                                                                                                                                                                                                                                                                                                                                                                                                                                                                                                                                                                                                                                                                                                                                                                                                                                                                                                                                                                                                                             | Microbiology and Virology Unit,Azienda Ospedale Padova,Padova,Italy                                                                                                                                            | Department of Molecular Medicine,Computational Medicine Group,Univeresity of Padova,Padova,Italy                             | Andrea Crisanti; Claudia Del Vecchio; Elisa Franchini; Enrico Lavezzo; Federico Bianca; Francesco Onelia; Laura Manuto; Marco Grazioli; Stefano Toppo                                                                                                                                                                                                                                                                                                                                                                                                                                                                                                                                                      |                                                                                                                                                                                                                                                                                       |
| EPI_ISL_547436, EPI_ISL_547437, EPI_ISL_547438, EPI_ISL_547439, EPI_ISL_547441, EPI_ISL_547442, EPI_ISL_547444, EPI_ISL_613694, EPI_ISL_615019, EPI_ISL_615047, EPI_ISL_615048, EPI_ISL_671285, EPI_ISL_671286, EPI_ISL_671287, EPI_ISL_671292, EPI_ISL_671297, EPI_ISL_671300, EPI_ISL_671314, EPI_ISL_671321                                                                                                                                                                                                                                                                                                                                                                                                                                                                                                                                                                                                                                                                                                                                                                                                                                                                                                                                                                                                                                                                                                 | see above                                                                                                                                                                                                      | Microbiology, Department of Pathology, St. Bernard's Hospital, Gibraltar Health Authority                                    | Respiratory Virus Unit, Microbiology Services Colindale, Public Health England                                                                                                                                                                                                                                                                                                                                                                                                                                                                                                                                                                                                                             | Charlotte Gillborn-Jones (Gibraltar); Dr Nicholas Cortes (Gibraltar); PHE Covid Sequencing Team                                                                                                                                                                                       |
| EPI_ISL_709984, EPI_ISL_766353                                                                                                                                                                                                                                                                                                                                                                                                                                                                                                                                                                                                                                                                                                                                                                                                                                                                                                                                                                                                                                                                                                                                                                                                                                                                                                                                                                                 | Microbiology, Department of Pathology, St. Bernard's Hospital, Gibraltar Health Authority                                                                                                                      | Respiratory Virus Unit, National Infection Service, Public Health England                                                    | Charlotte Gillborn-Jones (Gibraltar); Dr Nicholas Cortes (Gibraltar); PHE Covid Sequencing Team                                                                                                                                                                                                                                                                                                                                                                                                                                                                                                                                                                                                            |                                                                                                                                                                                                                                                                                       |
| EPI_ISL_475718, EPI_ISL_678275                                                                                                                                                                                                                                                                                                                                                                                                                                                                                                                                                                                                                                                                                                                                                                                                                                                                                                                                                                                                                                                                                                                                                                                                                                                                                                                                                                                 | Microbiology, University Hospital Donostia<br>Mikrobiologie, RARI                                                                                                                                              | Microbiology, University Hospital Donostia<br>Mikrobiologie, RARI                                                            | Cilla, G.; J.M.; Marimon; Montes, M.; Pineiro, L.<br>A.V.; Badanin; D.V.; E.A.; Fedorov; Guseva; Krasnov; Kutyrev; N.A.; N.P.; Naryshkina; Portenko; S.A.; Sharapova; Shcherbakova; Sosedova; V.V.; Y.M.                                                                                                                                                                                                                                                                                                                                                                                                                                                                                                   |                                                                                                                                                                                                                                                                                       |
| EPI_ISL_428718, EPI_ISL_429862, EPI_ISL_429866, EPI_ISL_429867, EPI_ISL_429868, EPI_ISL_429871, EPI_ISL_429872, EPI_ISL_437306, EPI_ISL_437312, EPI_ISL_437315, EPI_ISL_814073, EPI_ISL_814075                                                                                                                                                                                                                                                                                                                                                                                                                                                                                                                                                                                                                                                                                                                                                                                                                                                                                                                                                                                                                                                                                                                                                                                                                 | see above                                                                                                                                                                                                      | Ministry of Health Turkey                                                                                                    | Ayşe Başak Altaş; Fatma Bayraktar; Gülay Korukluğlu; Selçuk Kılıç; Süleyman Yalcin; Süleyman Yalcin; Tülin Demir; Yasemin Coşgun                                                                                                                                                                                                                                                                                                                                                                                                                                                                                                                                                                           |                                                                                                                                                                                                                                                                                       |
| EPI_ISL_451306, EPI_ISL_451307, EPI_ISL_451308, EPI_ISL_451309, EPI_ISL_460079, EPI_ISL_460082, EPI_ISL_460083, EPI_ISL_460084, EPI_ISL_460085, EPI_ISL_460086, EPI_ISL_460087, EPI_ISL_460088, EPI_ISL_460090, EPI_ISL_460091, EPI_ISL_460092, EPI_ISL_460094                                                                                                                                                                                                                                                                                                                                                                                                                                                                                                                                                                                                                                                                                                                                                                                                                                                                                                                                                                                                                                                                                                                                                 | see above                                                                                                                                                                                                      | Molecular Virology Unit, Fondazione IRCCS Policlinico San Matteo , Pavia                                                     | Laboratory of Virology, INMI Lazzaro Spallanzani IRCCS                                                                                                                                                                                                                                                                                                                                                                                                                                                                                                                                                                                                                                                     | Antonino Di Caro; Antonio Piralla; Barbara Bartolini; Cesare E.M. Gruber; Fausto Baldanti; Maria R. Capobianchi; Martina Rueca                                                                                                                                                        |
| EPI_ISL_462149                                                                                                                                                                                                                                                                                                                                                                                                                                                                                                                                                                                                                                                                                                                                                                                                                                                                                                                                                                                                                                                                                                                                                                                                                                                                                                                                                                                                 | Molecular diagnostic laboratory of Federal Budget Institution of Science "Central Research Institute of Epidemiology" of The Federal Service on Customers' Rights Protection and Human Well-being Surveillance | Group of Genomics and Postgenomic Technologies of Central Research Institute of Epidemiology                                 | Akimkin VG; Kaptelova VV; Korneenko EV; Samoilov AE; Shipulina OY; Sizova TV; Speranskaya AS; Tivanova EV                                                                                                                                                                                                                                                                                                                                                                                                                                                                                                                                                                                                  |                                                                                                                                                                                                                                                                                       |
| EPI_ISL_426884, EPI_ISL_426888, EPI_ISL_426892, EPI_ISL_426893, EPI_ISL_426895                                                                                                                                                                                                                                                                                                                                                                                                                                                                                                                                                                                                                                                                                                                                                                                                                                                                                                                                                                                                                                                                                                                                                                                                                                                                                                                                 | Motol University Hospital                                                                                                                                                                                      | Institute of Applied Biotechnologies a.s.                                                                                    | Adam Novotný; Jan Geryk; Kateřina Kvapilová; Martin Kašný; Milan Macek; Pavel Dřevínek; Petr Brož; Petr Klempť; Petr Kvapil                                                                                                                                                                                                                                                                                                                                                                                                                                                                                                                                                                                |                                                                                                                                                                                                                                                                                       |
| EPI_ISL_459577, EPI_ISL_459679, EPI_ISL_460977, EPI_ISL_489598, EPI_ISL_534636                                                                                                                                                                                                                                                                                                                                                                                                                                                                                                                                                                                                                                                                                                                                                                                                                                                                                                                                                                                                                                                                                                                                                                                                                                                                                                                                 | NHSGGC West of Scotland Specialist Virology Centre / MRC-University of Glasgow Centre for Virus Research                                                                                                       | Wellcome Sanger Institute for the COVID-19 Genomics UK (COG-UK) consortium                                                   | Alasdair MacLean; Alice Broos; Ana da Silva Filipe; Antonia Ho; Cordelia Langford; Daniel Mair; David K. Jackson; David L Robertson; Dominic Kwiatkowski; Elihu Aranday-Cortes; Emma Thomson and Alex Alderton; Ewan Harrison; Ian Johnston; James Shepherd; Jenna Nichols; John Sillitoe on behalf of the Wellcome Sanger Institute COVID-19 Surveillance Team (http://www.sanger.ac.uk/covid-team); Joseph Hughes; Kathy Li; Kathy Smollett; Kirstyn Brunker; Kyriaki Nomikou; Lily Tong; Marc Niebel; Natasha Jesudason; Natasha Johnson; Patawee Asamaphan; Rajiv Shah; Richard Orton; Roberto Amato; Rory Gunson; Sarah McDonald; Sonia Goncalves; Sreenu Vattipally; Stephen Carmichael; Yasmin Parr |                                                                                                                                                                                                                                                                                       |
| EPI_ISL_488066, EPI_ISL_488465, EPI_ISL_488472, EPI_ISL_488479, EPI_ISL_488485, EPI_ISL_488801                                                                                                                                                                                                                                                                                                                                                                                                                                                                                                                                                                                                                                                                                                                                                                                                                                                                                                                                                                                                                                                                                                                                                                                                                                                                                                                 | NU-OMICS DNA Sequencing research facility, Northumbria University                                                                                                                                              | Wellcome Sanger Institute for the COVID-19 Genomics UK (COG-UK) consortium                                                   | Andrew Nelson; Brendan Payne; Chris Duncan; Clive Graham; Cordelia Langford; Darren Smith and Alex Alderton; David K. Jackson; Debra Padgett; Dominic Kwiatkowski; Edward Barton; Emma Swindells; Ewan Harrison; Garren Scott; Gary Black; Gary Eltringham; Greg Young; Ian Johnston; Jane Greenaway; Jennifer Collins; John Allan; John Sillitoe on behalf of the Wellcome Sanger Institute COVID-19 Surveillance Team (http://www.sanger.ac.uk/covid-team); Joshua Loh; Lynn Dover; Matthew Bashton; Paul Baker; Roberto Amato; Sarah Essex; Shea Waugh; Shirelle Burton-Fanning; Sonia Goncalves; Steve Liggett; Wen Yew; Yusri Taha                                                                    |                                                                                                                                                                                                                                                                                       |
| EPI_ISL_452229, EPI_ISL_452235                                                                                                                                                                                                                                                                                                                                                                                                                                                                                                                                                                                                                                                                                                                                                                                                                                                                                                                                                                                                                                                                                                                                                                                                                                                                                                                                                                                 | Narhalsan Backa vardcentral                                                                                                                                                                                    | The Public Health Agency of Sweden                                                                                           | Anna Risberg; Anna-Malin Linde; Karin Tegmark-Wisell; Maria Lind Karlberg; Mats Olsson; Mia Brytting; Olov Svartstrom; Oskar Karlsson Lindsjö; Theresa Enkirch                                                                                                                                                                                                                                                                                                                                                                                                                                                                                                                                             |                                                                                                                                                                                                                                                                                       |
| EPI_ISL_523960, EPI_ISL_523962, EPI_ISL_523964, EPI_ISL_523966, EPI_ISL_523968                                                                                                                                                                                                                                                                                                                                                                                                                                                                                                                                                                                                                                                                                                                                                                                                                                                                                                                                                                                                                                                                                                                                                                                                                                                                                                                                 | National Agency for Public Health, Republic of Moldova                                                                                                                                                         | Charite Universitätsmedizin Berlin, Institute of Virology                                                                    | Ala Halacu; Barbara Mühlemann; Barbara Mühlemann; Christian Drosten; Elizabeta Jancheska; Golubinka Bosevsa; Joern Beheim-Schwarzbach; Jörn Beheim-Schwarzbach; Julia Schneider; Maja Kuzmanovska; Mariana Apostol; Talitha Veith; Terry Jones; Victor M Corman                                                                                                                                                                                                                                                                                                                                                                                                                                            |                                                                                                                                                                                                                                                                                       |
| EPI_ISL_467778, EPI_ISL_467779                                                                                                                                                                                                                                                                                                                                                                                                                                                                                                                                                                                                                                                                                                                                                                                                                                                                                                                                                                                                                                                                                                                                                                                                                                                                                                                                                                                 | National Influenza Centre Romania                                                                                                                                                                              | Charite Universitätsmedizin Berlin, Institute of Virology                                                                    | Barbara Muehleemann; Christian Drosten; Jörn Beheim-Schwarzbach; Julia Schneider; L. Ustea; M. Lazar; N. Paraschiv; Talitha Veith; Terry Jones; Victor M Corman                                                                                                                                                                                                                                                                                                                                                                                                                                                                                                                                            |                                                                                                                                                                                                                                                                                       |
| EPI_ISL_539780                                                                                                                                                                                                                                                                                                                                                                                                                                                                                                                                                                                                                                                                                                                                                                                                                                                                                                                                                                                                                                                                                                                                                                                                                                                                                                                                                                                                 | National Institute of Public Health (Czech Republic)                                                                                                                                                           | State Veterinary Institute Prague                                                                                            | A; D; H; Jirincova; L; Nagy; Novakova; Trnka; Vecerova, J.                                                                                                                                                                                                                                                                                                                                                                                                                                                                                                                                                                                                                                                 |                                                                                                                                                                                                                                                                                       |
| EPI_ISL_512597, EPI_ISL_512598, EPI_ISL_512599, EPI_ISL_512600, EPI_ISL_512605, EPI_ISL_512606, EPI_ISL_512607, EPI_ISL_512608, EPI_ISL_512609, EPI_ISL_512610, EPI_ISL_512611, EPI_ISL_512612, EPI_ISL_512617, EPI_ISL_512620, EPI_ISL_512621, EPI_ISL_512622, EPI_ISL_512623, EPI_ISL_512625, EPI_ISL_512626, EPI_ISL_512636                                                                                                                                                                                                                                                                                                                                                                                                                                                                                                                                                                                                                                                                                                                                                                                                                                                                                                                                                                                                                                                                                 | see above                                                                                                                                                                                                      | National Laboratory for Influenza/Virology reference laboratory, Public Health Center of the Ministry of Health of Ukraine   | Respiratory Virus Unit, Microbiology Services Colindale, Public Health England                                                                                                                                                                                                                                                                                                                                                                                                                                                                                                                                                                                                                             | Dr. Iryna Demchyshyna; PHE Covid Sequencing Team                                                                                                                                                                                                                                      |
| EPI_ISL_483637, EPI_ISL_416741, EPI_ISL_450497                                                                                                                                                                                                                                                                                                                                                                                                                                                                                                                                                                                                                                                                                                                                                                                                                                                                                                                                                                                                                                                                                                                                                                                                                                                                                                                                                                 | National Laboratory of Virology, Szentágotthai Research Centre<br>National Public Health Surveillance Laboratory, Vilnius, Lithuania                                                                           | National Laboratory of Virology, Szentágotthai Research Centre<br>Charite Universitaetsmedizin Berlin, Institute of Virology | Balázs Somogyi; Endre Gábor Tóth; Ferenc Jakab; Gábor Kemenesi<br>Ana Steponkienė; Barbara Muehleemann; Christian Drosten; Jörn Beheim-Schwarzbach; Jörn Beheim-Schwarzbach; Julia Schneider; Talitha Veith; Terry Jones; Victor M Corman                                                                                                                                                                                                                                                                                                                                                                                                                                                                  |                                                                                                                                                                                                                                                                                       |
| EPI_ISL_480224, EPI_ISL_480297, EPI_ISL_480298, EPI_ISL_480299, EPI_ISL_480300, EPI_ISL_480301, EPI_ISL_480302, EPI_ISL_480303, EPI_ISL_480304, EPI_ISL_480305, EPI_ISL_480306, EPI_ISL_480307, EPI_ISL_480308, EPI_ISL_480309, EPI_ISL_480310                                                                                                                                                                                                                                                                                                                                                                                                                                                                                                                                                                                                                                                                                                                                                                                                                                                                                                                                                                                                                                                                                                                                                                 | see above                                                                                                                                                                                                      | National Reference Laboratory "Influenza and acute respiratory diseases"                                                     | NRL-HIV                                                                                                                                                                                                                                                                                                                                                                                                                                                                                                                                                                                                                                                                                                    | Ivailo Alexiev; Ivan Ivanov; Ivva Philipova                                                                                                                                                                                                                                           |
| EPI_ISL_605061, EPI_ISL_605065, EPI_ISL_605069, EPI_ISL_605070                                                                                                                                                                                                                                                                                                                                                                                                                                                                                                                                                                                                                                                                                                                                                                                                                                                                                                                                                                                                                                                                                                                                                                                                                                                                                                                                                 | National Virus Reference Laboratory                                                                                                                                                                            | Irish Coronavirus Sequencing Consortium - Helixworks                                                                         | Conor Crosbie; Nimesh Pinnamaneni; Sachin Chalapati                                                                                                                                                                                                                                                                                                                                                                                                                                                                                                                                                                                                                                                        |                                                                                                                                                                                                                                                                                       |

|                                                                                                                                                                                                                                                                                                                                |                                                                                                                                                                                                                     |                                                                                                                                                                                                          |                                                                                                                                                                                                                                                                                                                                                                                                                                                                               |
|--------------------------------------------------------------------------------------------------------------------------------------------------------------------------------------------------------------------------------------------------------------------------------------------------------------------------------|---------------------------------------------------------------------------------------------------------------------------------------------------------------------------------------------------------------------|----------------------------------------------------------------------------------------------------------------------------------------------------------------------------------------------------------|-------------------------------------------------------------------------------------------------------------------------------------------------------------------------------------------------------------------------------------------------------------------------------------------------------------------------------------------------------------------------------------------------------------------------------------------------------------------------------|
| EPI_ISL_671375,<br>EPI_ISL_681893,<br>EPI_ISL_681919,<br>EPI_ISL_681920,<br>EPI_ISL_681922                                                                                                                                                                                                                                     | National Virus Reference Laboratory                                                                                                                                                                                 | Irish Coronavirus Sequencing Consortium - Teagasc Moorepark                                                                                                                                              | Calum Walsh; Fiona Crispie; John Kenny; Matthew McCabe; Paul Cotter                                                                                                                                                                                                                                                                                                                                                                                                           |
| EPI_ISL_639850,<br>EPI_ISL_671894,<br>EPI_ISL_837387                                                                                                                                                                                                                                                                           | National Virus Reference Laboratory                                                                                                                                                                                 | National Virus Reference Laboratory                                                                                                                                                                      | Cillian F De Gascun; Daniel Hare; Gabriel Gonzalez; Jonathan Dean; Michael Carr                                                                                                                                                                                                                                                                                                                                                                                               |
| EPI_ISL_516934,<br>EPI_ISL_516938                                                                                                                                                                                                                                                                                              | Nicolae Testemitanu State University of Medicine and Pharmacy                                                                                                                                                       | International Centre for Genetic Engineering and Biotechnology (ICGEB) and ARGO Open Lab Platform for Genome Sequencing                                                                                  | Dal Monego S; Licastro D; Marcello A; Rajasekharan S; Ulinici M                                                                                                                                                                                                                                                                                                                                                                                                               |
| EPI_ISL_420151                                                                                                                                                                                                                                                                                                                 | Nordland Hospital - Bodo, Laboratory Department, Molecular Biology Unit                                                                                                                                             | Norwegian Institute of Public Health, Department of Virology                                                                                                                                             | Hilde Elshaug; Kamilla Heddeland Instefjord; Karoline Bragstad; Kathrine Stene-Johansen; Olav Hungnes                                                                                                                                                                                                                                                                                                                                                                         |
| EPI_ISL_507127,<br>EPI_ISL_666105                                                                                                                                                                                                                                                                                              | Northumbria University / South Tees Hospitals NHS Foundation Trust / North Cumbria Integrated Care NHS Foundation Trust / North Tees and Hartlepool NHS Foundation Trust / Newcastle Hospitals NHS Foundation Trust | COVID-19 Genomics UK (COG-UK) Consortium                                                                                                                                                                 | Andrew Nelson; Brendan Payne; Clive Graham; Darren L Smith; Debra Padgett; Edward Barton; Emma Swindells; Garren Scott; Gary Black; Gary Eltringham; Giles S Holt; Greg R Young; Jane Greenaway; Jennifer Collins; John Allan; Joshua Loh; Lynn Dover; Matthew Bashton; Mohammad A Tariq; Paul Baker; Sarah Essex; Steve Liggett; Wen C Yew; Yusri Taha                                                                                                                       |
| EPI_ISL_417483,<br>EPI_ISL_417484,<br>EPI_ISL_417488,<br>EPI_ISL_420135,<br>EPI_ISL_775425                                                                                                                                                                                                                                     | Oslo University Hospital, Department of Medical Microbiology<br>Oslo University Hospital, Department of Medical Microbiology                                                                                        | Norwegian Institute of Public Health<br>Norwegian Institute of Public Health, Department of Virology                                                                                                     | Hilde Elshaug; Kamilla Heddeland Instefjord; Karoline Bragstad; Kathrine Stene-Johansen; Olav Hungnes<br>Atiya R Ali; Hilde Elshaug; Hilde Vollan; Kamilla Heddeland Instefjord; Karoline Bragstad; Kathrine Stene-Johansen; Marie Paulsen Madsen; Olav Hungnes; Rasmus Riis Kopperud                                                                                                                                                                                         |
| EPI_ISL_788962,<br>EPI_ISL_788963,<br>EPI_ISL_788967                                                                                                                                                                                                                                                                           | Ospedale "Di Venere"                                                                                                                                                                                                | Beaconlab (Bioinformatics, Evolution and Comparative Genomics lab), Dept of Biosciences, University on Milan                                                                                             | Chiara M; Iacobellis M; Manzari C; Parisi A; Pesole G; Pilusico R; d'Avenia M                                                                                                                                                                                                                                                                                                                                                                                                 |
| EPI_ISL_528927,<br>EPI_ISL_528928                                                                                                                                                                                                                                                                                              | Ospedale "Giuseppe Mazzini"-Teramo                                                                                                                                                                                  | Istituto Zooprofilattico Sperimentale dell'Abruzzo e Molise "G.Caporale"                                                                                                                                 | Ancora M; Cammà C; Curini V; Di Domenico M; Di Pasquale A; Lorusso A; Mangone I; Marcacci M; Puglia I; Rinaldi A; Savini G.                                                                                                                                                                                                                                                                                                                                                   |
| EPI_ISL_420563                                                                                                                                                                                                                                                                                                                 | Ospedale Civile Giuseppe Mazzini                                                                                                                                                                                    | Istituto Zooprofilattico Sperimentale dell'Abruzzo e Molise "G. Caporale"                                                                                                                                | Ancora M; Cammà C; Curini V; Di Domenico M; Di Pasquale A; Lorusso A; Mangone I; Marcacci M; Puglia I; Rinaldi A; Savini G                                                                                                                                                                                                                                                                                                                                                    |
| EPI_ISL_436732                                                                                                                                                                                                                                                                                                                 | Ospedale Civile S. Liberatore di Atri                                                                                                                                                                               | Istituto Zooprofilattico Sperimentale dell'Abruzzo e Molise "G.Caporale"                                                                                                                                 | Ancora M; Cammà C; Curini V; Di Domenico M; Di Pasquale A; Lorusso A; Mangone I; Marcacci M; Puglia I; Rinaldi A; Savini G                                                                                                                                                                                                                                                                                                                                                    |
| EPI_ISL_529009                                                                                                                                                                                                                                                                                                                 | Ospedale Civile S. Liberatore-Atri                                                                                                                                                                                  | Istituto Zooprofilattico Sperimentale dell'Abruzzo e Molise "G.Caporale"                                                                                                                                 | Ancora M; Cammà C; Curini V; Di Domenico M; Di Pasquale A; Lorusso A; Mangone I; Marcacci M; Puglia I; Rinaldi A; Savini G                                                                                                                                                                                                                                                                                                                                                    |
| EPI_ISL_528925                                                                                                                                                                                                                                                                                                                 | Ospedale Regionale San Salvatore-L'Aquila                                                                                                                                                                           | Istituto Zooprofilattico Sperimentale dell'Abruzzo e Molise "G.Caporale"                                                                                                                                 | Ancora M; Cammà C; Curini V; Di Domenico M; Di Pasquale A; Lorusso A; Mangone I; Marcacci M; Puglia I; Rinaldi A; Savini G                                                                                                                                                                                                                                                                                                                                                    |
| EPI_ISL_435148                                                                                                                                                                                                                                                                                                                 | Ospedale SS Annunziata                                                                                                                                                                                              | Istituto Zooprofilattico Sperimentale dell'Abruzzo e Molise "G.Caporale"                                                                                                                                 | Ancora M; Cammà C; Curini V; Di Domenico M; Di Pasquale A; Lorusso A; Mangone I; Marcacci M; Puglia I; Rinaldi A; Savini G                                                                                                                                                                                                                                                                                                                                                    |
| EPI_ISL_448551                                                                                                                                                                                                                                                                                                                 | Oxford Viromics, NDM, University of Oxford; Oxford University Hospitals; Basingstoke and North Hampshire Hospital                                                                                                   | COVID-19 Genomics UK (COG-UK) Consortium                                                                                                                                                                 | Alex Mobbs; Amy Trebes; Anita Justice; Catrin Moore; Christophe Fraser; David Bonsall; David Buck; Emma Wise; George Macintyre; Jessica Lynch; John Todd; Mariateresa de Cesare; Monique Andersson; Nathan Moore; Nick Cortes; Robert Shaw; Stephen Kidd; Tanya Golubchik                                                                                                                                                                                                     |
| EPI_ISL_443698, EPI_ISL_443772, EPI_ISL_443964, EPI_ISL_459052, EPI_ISL_488241, EPI_ISL_492530, EPI_ISL_492615, EPI_ISL_501573                                                                                                                                                                                                 | see above                                                                                                                                                                                                           | PHE South West Regional Laboratory, National Infection Service                                                                                                                                           | Wellcome Sanger Institute for the COVID-19 Genomics UK (COG-UK) consortium                                                                                                                                                                                                                                                                                                                                                                                                    |
| EPI_ISL_708184                                                                                                                                                                                                                                                                                                                 | Pamukkale University Hospital                                                                                                                                                                                       | Pamukkale University Department of Medical Genetics                                                                                                                                                      | Barry Vipond; Cordelia Langford; David K. Jackson; Dominic Kwiatkowski; Dr Peter Muir; Ewan Harrison; Hannah Pymont; Ian Johnston; John Sillitoe on behalf of the Wellcome Sanger Institute COVID-19 Surveillance Team (http://www.sanger.ac.uk/covid-team); Rich Hopes; Roberto Amato; Sonia Goncalves; Stephanie Hutchings; and Alex Alderton                                                                                                                               |
| EPI_ISL_528920                                                                                                                                                                                                                                                                                                                 | Presidio Ospedaliero "Santo Spirito"-Pescara                                                                                                                                                                        | Istituto Zooprofilattico Sperimentale dell'Abruzzo e Molise "G.Caporale"                                                                                                                                 | Onur TOKGUN et al.                                                                                                                                                                                                                                                                                                                                                                                                                                                            |
| EPI_ISL_429226                                                                                                                                                                                                                                                                                                                 | Presidio Ospedaliero Santo Spirito                                                                                                                                                                                  | Istituto Zooprofilattico Sperimentale dell'Abruzzo e Molise "G. Caporale"                                                                                                                                | Ancora M; Cammà C; Curini V; Di Domenico M; Di Pasquale A; Lorusso A; Mangone I; Marcacci M; Puglia I; Rinaldi A; Savini G                                                                                                                                                                                                                                                                                                                                                    |
| EPI_ISL_572329                                                                                                                                                                                                                                                                                                                 | Public Health Authority of the Slovak Republic, Bratislava                                                                                                                                                          | Faculty of Natural Sciences, Comenius University in Bratislava                                                                                                                                           | Boris Klempa; Broňa Brejová; Dominika Fričová; Edita Starohová; Elena Tichá; Jozef Nosek; Juraj Kopáček; Kristína Boršová; Martina Ličková; Martina Neboháčová; Monika Sláviková; Sabina Fumačová Havlíková; Tomáš Vinař; Viktoriia Hodorová; Viktoriia Čabanová; Ľubomíra Lukáčiková                                                                                                                                                                                         |
| EPI_ISL_516988,<br>EPI_ISL_516989                                                                                                                                                                                                                                                                                              | Public Health Authority of the Slovak Republic, Department of Medical Microbiology                                                                                                                                  | Charite Universitätsmedizin Berlin, Institute of Virology                                                                                                                                                | Barbara Muehleemann; Christian Drosten; Julia Schneider; Jörn Beheim-Schwarzbach; Mgr. Edita Staronova; Talitha Veith; Terry Jones; Victor M Corman                                                                                                                                                                                                                                                                                                                           |
| EPI_ISL_457333,<br>EPI_ISL_457362,<br>EPI_ISL_457365,<br>EPI_ISL_725216                                                                                                                                                                                                                                                        | Quadram Institute Bioscience                                                                                                                                                                                        | COVID-19 Genomics UK (COG-UK) Consortium                                                                                                                                                                 | Alexander J Trotter; Alison E. Mather; Alp Aydin; Ana P. Tedi; Anastasia Kolyva; Andrew Bell; Andrew J. Page; Claire Stuart; Dave J. Baker; Gemma L. Kay; John Wain; Justin O'Grady; Leonardo de Oliveira Martins; Lizzie Meadows; Maria Diaz; Mark Webber; Muhammed Yasir; Nabil-Fareed Alikhan; Ngozi Elumogo; Nicholas M. Thomson; Rachael Stanley; Rachel Gilroy; Reenesh Prakash; Samir Dervisevic; Samuel Bloomfield; Steven Rudder; Thanh Le-Viet                      |
| EPI_ISL_425489,<br>EPI_ISL_652633,<br>EPI_ISL_741647                                                                                                                                                                                                                                                                           | Queens Medical Centre, Clinical Microbiology Department / DeepSeq Nottingham                                                                                                                                        | COVID-19 Genomics UK (COG-UK) Consortium                                                                                                                                                                 | Christopher Moore; Fel Sang; Gemma Clark; Hannah Howson-Wells; Johnny Debebe; Jonathan Ball; Joseph Chappell; Manjinder Khakh; Matthew Carlisle; Matthew Loose; Michelle M Lister; Nadine Holmes; Patrick McClure; Theocharis Tsolerides; Vicki M Fleming; Victoria Wright; Wendy Smith                                                                                                                                                                                       |
| EPI_ISL_441355, EPI_ISL_441370, EPI_ISL_441373, EPI_ISL_441378, EPI_ISL_441403, EPI_ISL_441416, EPI_ISL_441417, EPI_ISL_441420, EPI_ISL_441421, EPI_ISL_441425, EPI_ISL_441426, EPI_ISL_441434, EPI_ISL_441435, EPI_ISL_453469, EPI_ISL_453479, EPI_ISL_453483, EPI_ISL_585097, EPI_ISL_585126, EPI_ISL_585164, EPI_ISL_585165 | see above                                                                                                                                                                                                           | Regional Virus Laboratory, Belfast Health and Social Care Trust                                                                                                                                          | Alison Watt; Ciara Cox; Connal McCaughey; David Simpson; Derek Fairley; James McKenna; Mairead Connor; Susan Feeney; Tanya Curran; Zoltan Molnar                                                                                                                                                                                                                                                                                                                              |
| EPI_ISL_451934                                                                                                                                                                                                                                                                                                                 | Research Unit, University Hospital for Infectious Diseases "Dr. Fran Mihaljević"                                                                                                                                    | Cicin Sain lab, Helmholtz Centre for Infection Research                                                                                                                                                  | Ivan-Christian Kuroti; Kathrin Eschke; Zeeshan Chaudhry; Željka Mačak Šafranko                                                                                                                                                                                                                                                                                                                                                                                                |
| EPI_ISL_678730,<br>EPI_ISL_678780                                                                                                                                                                                                                                                                                              | Respiratory Virus Unit, Microbiology Services Colindale, Public Health England                                                                                                                                      | COVID-19 Genomics UK (COG-UK) Consortium                                                                                                                                                                 | PHE Covid Sequencing Team                                                                                                                                                                                                                                                                                                                                                                                                                                                     |
| EPI_ISL_418676, EPI_ISL_420766, EPI_ISL_423574, EPI_ISL_423734, EPI_ISL_464976, EPI_ISL_464985, EPI_ISL_465921                                                                                                                                                                                                                 | see above                                                                                                                                                                                                           | Respiratory Virus Unit, Microbiology Services Colindale, Public Health England                                                                                                                           | Angie Lackenby; Joanna Ellis; Jonathan Hubb; Kirstin Edwards; Leena Bhaw; Maria Zambon; Monica Galliano; Omolola Akinbami; PHE Covid Sequencing Team; Richard Myers; Shahjahan Miah; Steven Platt; Tiina Talts                                                                                                                                                                                                                                                                |
| EPI_ISL_804051, EPI_ISL_804052, EPI_ISL_833436, EPI_ISL_833437, EPI_ISL_833439, EPI_ISL_833440, EPI_ISL_833441, EPI_ISL_833442, EPI_ISL_833443, EPI_ISL_833445, EPI_ISL_833449, EPI_ISL_833454, EPI_ISL_833455                                                                                                                 | see above                                                                                                                                                                                                           | SC (UCO) Igiene e Sanità Pubblica (funzione integrata con SC Microbiologia e Virologia) e Laboratory of Molecular Virology of the International Centre for Genetic Engineering and Biotechnology (ICGEB) | ARGO Laboratorio Genomica ed Epigenomica                                                                                                                                                                                                                                                                                                                                                                                                                                      |
| EPI_ISL_511247,<br>EPI_ISL_511252                                                                                                                                                                                                                                                                                              | SYNLAB                                                                                                                                                                                                              | Instituto Nacional de Saude (INSA) and Instituto Gulbenkian de Ciencia (IGC)                                                                                                                             | Borges et al                                                                                                                                                                                                                                                                                                                                                                                                                                                                  |
| EPI_ISL_457719, EPI_ISL_457723, EPI_ISL_457725, EPI_ISL_457729, EPI_ISL_457735, EPI_ISL_457737, EPI_ISL_457740, EPI_ISL_516627                                                                                                                                                                                                 | see above                                                                                                                                                                                                           | SYNLAB Eesti OÜ                                                                                                                                                                                          | Charite Universitätsmedizin Berlin, Institute of Virology                                                                                                                                                                                                                                                                                                                                                                                                                     |
| EPI_ISL_420540                                                                                                                                                                                                                                                                                                                 | SYNLAB Eesti OÜ                                                                                                                                                                                                     | Charité Universitätsmedizin Berlin, Institute of Virology                                                                                                                                                | Barbara Muehleemann; Christian Drosten; Jörn Beheim-Schwarzbach; Julia Schneider; Paul Naaber; Talitha Veith; Terry Jones; Victor M Corman                                                                                                                                                                                                                                                                                                                                    |
| EPI_ISL_452231                                                                                                                                                                                                                                                                                                                 | Sarolედens Familjelakare                                                                                                                                                                                            | The Public Health Agency of Sweden                                                                                                                                                                       | Barbara Muehleemann; Christian Drosten; Jörn Beheim-Schwarzbach; Julia Schneider; Paul Naaber; Talitha Veith; Terry Jones; Victor M Corman                                                                                                                                                                                                                                                                                                                                    |
| EPI_ISL_661189, EPI_ISL_661200, EPI_ISL_676581, EPI_ISL_676585, EPI_ISL_676589, EPI_ISL_676593, EPI_ISL_676597, EPI_ISL_676598, EPI_ISL_676599, EPI_ISL_676600                                                                                                                                                                 | see above                                                                                                                                                                                                           | Scientific Veterinary Institute Novi Sad                                                                                                                                                                 | Anna Risberg; Anna-Malin Linde; Karin Tegmark-Wisell; Katarina Jarbur; Maria Lind Karlberg; Mia Brytting; Olov Svartstrom; Oskar Karlsson Lindsjö; Theresa Enkirsch                                                                                                                                                                                                                                                                                                           |
| EPI_ISL_436246,<br>EPI_ISL_436248                                                                                                                                                                                                                                                                                              | Servicio de Microbiología. Hospital Universitario Doctor Peset                                                                                                                                                      | Sequencing and Bioinformatics Service and Molecular Epidemiology Research Group. FISABIO-Public Health                                                                                                   | Afonso, C.; Banovic Djeri, B.; Jankovic, M.; Jovanovic, T.; Knezevic, A.; Petrovic, T.; Sekler, M.; Tesovic, B.; Vidanovic, D.; Volkening, J.                                                                                                                                                                                                                                                                                                                                 |
| EPI_ISL_419675,<br>EPI_ISL_436219,<br>EPI_ISL_436225                                                                                                                                                                                                                                                                           | Servicio de Microbiología. Consorcio Hospital General Universitario de Valencia                                                                                                                                     | Sequencing and Bioinformatics Service and Molecular Epidemiology Research Group. FISABIO-Public Health                                                                                                   | Beatriz Beamud; Fernando Gonzalez-Candelas; Giuseppe D'Auria; Griselda De Marco; Inma Galán Vendrell; Ivan Ansari; Jose Miguel Nogueira Coito; Juan Alberola Engudanos; Juan Jose Camarena Miñana; Lidia Ruiz Roldan; Lúcia Martínez-Priego; Loreto Ferrús Abad; Maria Alma Bracho; Mariana Reyes-Prieto; Marta Pla Diaz; Neris Garcia-Gonzalez; Paula Ruiz-Hueso; Rosa González Pellicer; Sandra Carbo; Vicente Soriano Chirona                                              |
| EPI_ISL_509619,<br>EPI_ISL_509626                                                                                                                                                                                                                                                                                              | Servicio de Microbiología. HRU de Málaga. Servicio Andaluz de Salud                                                                                                                                                 | SeqCOVID-SPAIN consortium/IBV(CSIC)                                                                                                                                                                      | Beatriz Beamud; Concepción Gimeno; Fernando Gonzalez-Candelas; Giuseppe D'Auria; Griselda De Marco; Inma Galán Vendrell; Lidia Ruiz Roldan; Lúcia Martínez-Priego; Loreto Ferrús Abad; Maria Alma Bracho; Maria Dolores Ocete; Mariana Reyes-Prieto; Marta Pla Diaz; Neris Garcia-Gonzalez; Paula Ruiz-Hueso; Vicente Soriano Chirona                                                                                                                                         |
| EPI_ISL_528995, EPI_ISL_528996, EPI_ISL_528997, EPI_ISL_528998, EPI_ISL_528999, EPI_ISL_529000, EPI_ISL_529001, EPI_ISL_529003, EPI_ISL_529004, EPI_ISL_529005                                                                                                                                                                 | see above                                                                                                                                                                                                           | Servizio di igiene epidemiologia e sanità pubblica (SIESP)-Chiati                                                                                                                                        | Inmaculada de Toro Peinado. MªConcepción Mediavilla Gradolph. Begoña Palop Borrás and SeqCOVID-SPAIN consortium                                                                                                                                                                                                                                                                                                                                                               |
| EPI_ISL_710547                                                                                                                                                                                                                                                                                                                 | Sestre Milosrdnice University Hospital Center                                                                                                                                                                       | Ruder Boškovic Institute: Forensic Science Centre Ivan Vučetić; University of Zagreb Faculty of Science                                                                                                  | Ancora M; Cammà C; Curini V; Di Domenico M; Di Pasquale A; Lorusso A; Mangone I; Marcacci M; Puglia I; Rinaldi A; Savini G.                                                                                                                                                                                                                                                                                                                                                   |
| EPI_ISL_475554,<br>EPI_ISL_548245,<br>EPI_ISL_548246,<br>EPI_ISL_710584                                                                                                                                                                                                                                                        | Skovde/Unilabs                                                                                                                                                                                                      | The Public Health Agency of Sweden                                                                                                                                                                       | Ana Livun; Antonela Blažeković; Boris Maček; Danilo Licastro; Dunja Glavaš; Fran Borovečki; Gordana Maravić Vlahoviček; Ivan Šamija; Ivana Čelap; Josipa Skelin; Kristian Vlahoviček; Kristina Gotovac Jerečić; Lidija Cvetko-Krajinović; Lucija Markulin; Maja Kuzman; Marina Korolija; Mario Štefanović; Mirjana Domazet-Lošo; Paula Stanci; Robert Belužić; Rosa Karić; Sanja Tadinac; Tomislav Domazet-Lošo; Vjekoslav Tomačić; Vladimir Krajnović; Željka Mačak Šafranko |
| EPI_ISL_408431                                                                                                                                                                                                                                                                                                                 | Sorbonne Université, Inserm et Assistance Publique-Hôpitaux de Paris (Pitié Salpêtrière)                                                                                                                            | National Reference Center for Viruses of Respiratory Infections, Institut Pasteur, Paris                                                                                                                 | Anna Risberg; Anna-Malin Linde; Department of Microbiology; Karin Tegmark-Wisell; Maria Lind Karlberg; Mattias Haukland; Mia Brytting; Olov Svartstrom; Oskar Karlsson Lindsjö; Petra Edquist; Reza Advani; Sandra Broddesson; Shaman Muradrasli; The Public Health Agency of Sweden                                                                                                                                                                                          |
|                                                                                                                                                                                                                                                                                                                                |                                                                                                                                                                                                                     |                                                                                                                                                                                                          | Angela Brisebarre; Anne-Geneviève Marcelin; David Boutolleau; Elise Klément; Eric Caumes.; Flora Donati; Marion Barbet; Maud Vanpeene; Mélanie Albert; Méline Bizard; Sonia Burrel; Sylvie Behillili; Sylvie van der Werf; Valérie Pouchere; Vincent Calvez; Vincent Enouf                                                                                                                                                                                                    |

|                                                                                                                                                                                                                                                                                                |                                                                                                                                                                                                 |                                                                                                                                        |                                                                                                                                                                                                                                                                                                                                                                                                                                                                                                                                                                                                                                                                                                                                                                       |
|------------------------------------------------------------------------------------------------------------------------------------------------------------------------------------------------------------------------------------------------------------------------------------------------|-------------------------------------------------------------------------------------------------------------------------------------------------------------------------------------------------|----------------------------------------------------------------------------------------------------------------------------------------|-----------------------------------------------------------------------------------------------------------------------------------------------------------------------------------------------------------------------------------------------------------------------------------------------------------------------------------------------------------------------------------------------------------------------------------------------------------------------------------------------------------------------------------------------------------------------------------------------------------------------------------------------------------------------------------------------------------------------------------------------------------------------|
| EPI_ISL_450346                                                                                                                                                                                                                                                                                 | St.Olavs hospital/NTNU                                                                                                                                                                          | Institute of Genomics Core Facility, University of Tartu                                                                               | Aleksandr Ianevski; Denis Kainov; Janne-Fossum Malmring; Svein Arne Nordbø; Tuuli Reisberg                                                                                                                                                                                                                                                                                                                                                                                                                                                                                                                                                                                                                                                                            |
| EPI_ISL_428883, EPI_ISL_428900                                                                                                                                                                                                                                                                 | State Research Center of Virology and Biotechnology VECTOR, Department of Collection of Microorganisms                                                                                          | State Research Center of Virology and Biotechnology VECTOR, Department of Collection of Microorganisms                                 | Alexander N. Shvalov; Elena V. Gavrilova; Oleg V. Pyankov; Rinat A. Maksyutov; Sergey A. Bodnev; Tatyana V. Tregubchak                                                                                                                                                                                                                                                                                                                                                                                                                                                                                                                                                                                                                                                |
| EPI_ISL_491046, EPI_ISL_491050, EPI_ISL_491066, EPI_ISL_491067, EPI_ISL_491069, EPI_ISL_491070, EPI_ISL_491072, EPI_ISL_491087, EPI_ISL_491090, EPI_ISL_678398                                                                                                                                 |                                                                                                                                                                                                 |                                                                                                                                        |                                                                                                                                                                                                                                                                                                                                                                                                                                                                                                                                                                                                                                                                                                                                                                       |
| see above                                                                                                                                                                                                                                                                                      | Suceava County Emergency Hospital                                                                                                                                                               | "Stefan cel Mare" University Metagenomics Lab                                                                                          | Antoniadis Panagiotis et al.; Lobiuc Andrei; Lobiuc Andrei et al.; Puscaselu Roxana                                                                                                                                                                                                                                                                                                                                                                                                                                                                                                                                                                                                                                                                                   |
| EPI_ISL_475564                                                                                                                                                                                                                                                                                 | Surbrunns VC                                                                                                                                                                                    | The Public Health Agency of Sweden                                                                                                     | Anna Risberg; Anna-Malin Linde; Karin Tegmark-Wisell; Maria Lind Karlberg; Mattias Haukland; Mia Brytting; Olov Svartstrom; Oskar Karlsson Lindsjö; Reza Advani; Sandra Brodlesson                                                                                                                                                                                                                                                                                                                                                                                                                                                                                                                                                                                    |
| EPI_ISL_530348, EPI_ISL_530349, EPI_ISL_541138, EPI_ISL_577630, EPI_ISL_577631, EPI_ISL_577632, EPI_ISL_584073, EPI_ISL_584079                                                                                                                                                                 |                                                                                                                                                                                                 |                                                                                                                                        |                                                                                                                                                                                                                                                                                                                                                                                                                                                                                                                                                                                                                                                                                                                                                                       |
| see above                                                                                                                                                                                                                                                                                      | The National Institute of Public Health                                                                                                                                                         | State Veterinary Institute Prague                                                                                                      | A; D; H; J; Jirincova; L; Nagy; Novakova; Trnka; Vecerova                                                                                                                                                                                                                                                                                                                                                                                                                                                                                                                                                                                                                                                                                                             |
| EPI_ISL_471530, EPI_ISL_471550, EPI_ISL_476067                                                                                                                                                                                                                                                 | The National Institute of Public Health                                                                                                                                                         | State Veterinary Institute Prague and The National Institute of Public Health                                                          | A; D; H; J; Jirincova; L; Nagy; Novakova; Trnka; Vecerova                                                                                                                                                                                                                                                                                                                                                                                                                                                                                                                                                                                                                                                                                                             |
| EPI_ISL_541335                                                                                                                                                                                                                                                                                 | The National Institute of Public Health                                                                                                                                                         | Sídlištní 136/24 165 03, Prague Czech Republic                                                                                         | A; D; H; J; Jirincova; L; Nagy; Novakova; Trnka; Vecerova                                                                                                                                                                                                                                                                                                                                                                                                                                                                                                                                                                                                                                                                                                             |
| EPI_ISL_489708                                                                                                                                                                                                                                                                                 | The National Institute of Public Health                                                                                                                                                         | The National Institute of Public Health and State Veterinary Institute Prague                                                          | A; D; H; J; Jirincova; L; Nagy; Novakova; Trnka; Vecerova                                                                                                                                                                                                                                                                                                                                                                                                                                                                                                                                                                                                                                                                                                             |
| EPI_ISL_417591, EPI_ISL_417602, EPI_ISL_424369, EPI_ISL_424379, EPI_ISL_424381, EPI_ISL_424382, EPI_ISL_424401, EPI_ISL_424427, EPI_ISL_424437, EPI_ISL_424438, EPI_ISL_424470, EPI_ISL_424471, EPI_ISL_424472, EPI_ISL_424473, EPI_ISL_424482, EPI_ISL_424493, EPI_ISL_424499, EPI_ISL_424624 |                                                                                                                                                                                                 |                                                                                                                                        |                                                                                                                                                                                                                                                                                                                                                                                                                                                                                                                                                                                                                                                                                                                                                                       |
| see above                                                                                                                                                                                                                                                                                      | The National University Hospital of Iceland                                                                                                                                                     | deCODE genetics                                                                                                                        | Agnar Helgason; Alma Moller; Arna B Agustsdottir; Arnaldur Gylfason; Asgeir Sigurdsson; Aslaug Jonasdottir; Berglind Eiríksdóttir; Bjarni Thorbjörnsson; Brynjar O Jonsson; Daniel F Gudbjartsson; Droplaug N Magnúsdóttir; Elisabet E Gardarsdóttir; Emil A Thorarensen; Gardar Sveinbjörnsson; Gisli Masson; Gudmundur Georgsson; Gudmundur L Norddahl; Gudrun Sigmundsdóttir; Hakon Jonsson; Hilma Holm; Ingileif Jónsdóttir; Jóna Saemundsdóttir; Kamilla S Josefsdóttir; Karl Stefansson; Kjetan R Gudmundsson; Kristin E Sveinsdóttir; Louise le Roux; Mahney Sveinsdóttir; Olafía S Gretarsdóttir; Olafur T Magnússon; Pall Melsted; Patrick Slem; Run Fridriksdóttir; Thora R Gunnarsdóttir; Thorður Kristjánsson; Thorolfur Gudnason; Unnur Thorsteinsdóttir |
| EPI_ISL_451948                                                                                                                                                                                                                                                                                 | The Republican Research and Practical Center for Epidemiology and Microbiology                                                                                                                  | Charite Universitätsmedizin Berlin, Institute of Virology                                                                              | Barbara Mühlemann; Christian Drosten; Jörn Beheim-Schwarzbach; Julia Schneider; Natalia Shmaliyova; Natalia Sivets; Talitha Veith; Terry Jones; Victor M Corman                                                                                                                                                                                                                                                                                                                                                                                                                                                                                                                                                                                                       |
| EPI_ISL_419692, EPI_ISL_419693                                                                                                                                                                                                                                                                 | The Republican Research and Practical Center for Epidemiology and Microbiology                                                                                                                  | Charité Universitätsmedizin Berlin, Institute of Virology                                                                              | Barbara Mühlemann; Christian Drosten; Jörn Beheim-Schwarzbach; Julia Schneider; Natalia Shmaliyova; Natalia Sivets; Talitha Veith; Terry Jones; Victor M Corman                                                                                                                                                                                                                                                                                                                                                                                                                                                                                                                                                                                                       |
| EPI_ISL_754232, EPI_ISL_754233, EPI_ISL_754235                                                                                                                                                                                                                                                 | The Republican Research and Practical Center for Epidemiology and Microbiology (RRPCEM)                                                                                                         | WHO National Influenza Centre Russian Federation                                                                                       | Anatoly Krasko; Andrey Komissarov; Anna Ivanova; Artem Fadeev; Daria Danilenko; Dmitry Bazhenov; Dmitry Lioznov; Elena Gasich; Elena Nabieva; Georgii Bazykin; Kirill Bulda; Kseniya Safina; Kseniya Komissarova                                                                                                                                                                                                                                                                                                                                                                                                                                                                                                                                                      |
| EPI_ISL_779711                                                                                                                                                                                                                                                                                 | The University Hospital Brno                                                                                                                                                                    | Institute of Applied Biotechnologies a.s.                                                                                              | Martin Kašný; Ondřej Brzoh; Petr Klempť; Petr Kvapil                                                                                                                                                                                                                                                                                                                                                                                                                                                                                                                                                                                                                                                                                                                  |
| EPI_ISL_414487, EPI_ISL_418582, EPI_ISL_418583, EPI_ISL_437687                                                                                                                                                                                                                                 | UCD National Virus Reference Laboratory                                                                                                                                                         | UCD National Virus Reference Laboratory                                                                                                | Alison Murphy; Brendan Crowley; Brendan Loftus; Cillian F De Gascun; Gabriel Gonzalez; Jeff Connell; Jonathan Dean; Ken Wolfe; Kevin Byrne; Michael Carr; Michael J. Carr; Suzie Coughlan                                                                                                                                                                                                                                                                                                                                                                                                                                                                                                                                                                             |
| EPI_ISL_511643                                                                                                                                                                                                                                                                                 | ULS Guarda                                                                                                                                                                                      | Instituto Nacional de Saude (INSA)                                                                                                     | Borges et al                                                                                                                                                                                                                                                                                                                                                                                                                                                                                                                                                                                                                                                                                                                                                          |
| EPI_ISL_454319, EPI_ISL_454321, EPI_ISL_454322                                                                                                                                                                                                                                                 | ULSM - Matosinhos                                                                                                                                                                               | Instituto Nacional de Saude (INSA)                                                                                                     | Borges et al                                                                                                                                                                                                                                                                                                                                                                                                                                                                                                                                                                                                                                                                                                                                                          |
| EPI_ISL_636473                                                                                                                                                                                                                                                                                 | ULSS6 Piove di Sacco                                                                                                                                                                            | Istituto Zooprofilattico Sperimentale delle Venezie                                                                                    | Adelaide Milani; Alessia Schivo; Alice Fusaro; Ambra Pastori; Annalisa Salviato; Antonia Ricci; Bianca Zecchin; Calogero Terregino; Erika Giorgia Quaranta; Isabella Monne                                                                                                                                                                                                                                                                                                                                                                                                                                                                                                                                                                                            |
| EPI_ISL_522855, EPI_ISL_522862, EPI_ISL_522863                                                                                                                                                                                                                                                 | ULSS9 Distretto di Bussolengo                                                                                                                                                                   | Istituto Zooprofilattico Sperimentale delle Venezie                                                                                    | Adelaide Milani; Alessia Schivo; Alice Fusaro; Ambra Pastori; Annalisa Salviato; Antonia Ricci; Bianca Zecchin; Calogero Terregino; Erika Giorgia Quaranta; Isabella Monne                                                                                                                                                                                                                                                                                                                                                                                                                                                                                                                                                                                            |
| EPI_ISL_582123, EPI_ISL_583953, EPI_ISL_583954, EPI_ISL_583955, EPI_ISL_583957, EPI_ISL_583958, EPI_ISL_583960, EPI_ISL_583961                                                                                                                                                                 |                                                                                                                                                                                                 |                                                                                                                                        |                                                                                                                                                                                                                                                                                                                                                                                                                                                                                                                                                                                                                                                                                                                                                                       |
| see above                                                                                                                                                                                                                                                                                      | UOC Microbiologia e Virologia, Azienda Ospedaliera Universitaria Senese, Siena, Italy                                                                                                           | Dipartimento di Biotecnologie Mediche                                                                                                  | Claudia Gandolfo; David Pinzauti; Francesco Santoro; Gabriele Anichini; Gianni Pozzi; Maria Grazia Cusi                                                                                                                                                                                                                                                                                                                                                                                                                                                                                                                                                                                                                                                               |
| EPI_ISL_734506, EPI_ISL_734507, EPI_ISL_734508, EPI_ISL_734511, EPI_ISL_734512, EPI_ISL_734513, EPI_ISL_734515, EPI_ISL_734516, EPI_ISL_734521, EPI_ISL_734522, EPI_ISL_734523, EPI_ISL_734593, EPI_ISL_735002                                                                                 |                                                                                                                                                                                                 |                                                                                                                                        |                                                                                                                                                                                                                                                                                                                                                                                                                                                                                                                                                                                                                                                                                                                                                                       |
| see above                                                                                                                                                                                                                                                                                      | UZ Leuven, National Reference Laboratory for Coronaviruses, Laboratory Medicine, Leuven, Belgium                                                                                                | KU Leuven, Rega Institute, Clinical and Epidemiological Virology                                                                       | Bert Vanmechelen; Joan Marti-Carreras; Piet Maes; Tony Wawina-Bokalanga                                                                                                                                                                                                                                                                                                                                                                                                                                                                                                                                                                                                                                                                                               |
| EPI_ISL_471172                                                                                                                                                                                                                                                                                 | Unilabs Laboratory Medicine                                                                                                                                                                     | Norwegian Institute of Public Health, Department of Virology                                                                           | Hilde Elshaug; Kamilla Heddeland Instefjord; Karoline Bragstad; Kathrine Stene-Johansen; Olav Hungnes; Rasmus Riis Kopperud                                                                                                                                                                                                                                                                                                                                                                                                                                                                                                                                                                                                                                           |
| EPI_ISL_490425, EPI_ISL_507107, EPI_ISL_665173                                                                                                                                                                                                                                                 | University College London Hospital                                                                                                                                                              | COVID-19 Genomics UK (COG-UK) Consortium                                                                                               | Catherine Houllhan; Dan Frampton; Judith Heaney; Matthew Byott; Moira Spyer and Eleni Nastouli; Stuart Kirk                                                                                                                                                                                                                                                                                                                                                                                                                                                                                                                                                                                                                                                           |
| EPI_ISL_440998, EPI_ISL_478444, EPI_ISL_839020                                                                                                                                                                                                                                                 | University College London, Great Ormond Street Hospital for Children NHS Foundation Trust, Imperial College Healthcare NHS Trust                                                                | COVID-19 Genomics UK (COG-UK) Consortium                                                                                               | Alison Holmes; Charlotte Williams; Helena Tutili; Jacqueline Findlay; James Price; Judith Breuer; Julianne Brown; Kathryn Harris; Leysa Forrest; Mark Kristiansen; Paola Niola; Paola Resende Silva; Patricia Dyal; Paul Randell; Rachel Williams; Sam Weeks; Samuel Weeks; Sergi Castellano; Sunando Roy; Tony Brooks; Yasmin Panchbhaya                                                                                                                                                                                                                                                                                                                                                                                                                             |
| EPI_ISL_710548, EPI_ISL_710549, EPI_ISL_710550, EPI_ISL_710551, EPI_ISL_710552, EPI_ISL_710561                                                                                                                                                                                                 | University Hospital Dubrava                                                                                                                                                                     | Ruder Boškovic Institute; Forensic Science Centre Ivan Vučetić; University of Zagreb Faculty of Science                                | Ana Livun; Antonela Blažeković; Boris Maček; Danilo Licastro; Dunja Glavaš; Fran Borovečki; Fuad Čosović; Gordana Maravić Vlahovićek; Ivan Šamija; Ivana Čelap; Jasna Kašman; Josipa Skelin; Katarina Marija Tupek; Kristian Vlahovićek; Kristina Gotovac Jerečić; Lidija Cvetko-Krajinović; Lucija Bašić; Lucija Markulin; Maja Kuzman; Marina Korolija; Mario Stefanović; Mirjana Domazet-Lošo; Paula Stanci; Petra Vrabec; Robert Belužić; Rosa Karičić; Sanja Tadinac; Senčica Pejša; Tomislav Domazet-Lošo; Valentina Đumilijan-Combaj; Vjekoslav Tomačić; Vladimir Krajinović; Zeljka Mačak Šafranko                                                                                                                                                            |
| EPI_ISL_454578, EPI_ISL_454581, EPI_ISL_454583, EPI_ISL_454588, EPI_ISL_454592                                                                                                                                                                                                                 | University Hospital for Infectious Diseases "Dr. Fran Mihaljević", Research Unit                                                                                                                | University of Zagreb, Centre for research and knowledge transfer in biotechnology                                                      | Anamarija Slovic; Ivan-Christian Kurolt; Jelena Ivancic Jelecki                                                                                                                                                                                                                                                                                                                                                                                                                                                                                                                                                                                                                                                                                                       |
| EPI_ISL_420152                                                                                                                                                                                                                                                                                 | University Hospital of Northern Norway, Department for Microbiology and Infectious Disease Control                                                                                              | Norwegian Institute of Public Health, Department of Virology                                                                           | Hilde Elshaug; Kamilla Heddeland Instefjord; Karoline Bragstad; Kathrine Stene-Johansen; Olav Hungnes                                                                                                                                                                                                                                                                                                                                                                                                                                                                                                                                                                                                                                                                 |
| EPI_ISL_738085                                                                                                                                                                                                                                                                                 | University Hospitals of Geneva, Laboratory of Virology                                                                                                                                          | University Hospitals of Geneva, Laboratory of Virology                                                                                 | Cordey Samuel and Laubscher Florian                                                                                                                                                                                                                                                                                                                                                                                                                                                                                                                                                                                                                                                                                                                                   |
| EPI_ISL_775910, EPI_ISL_775916, EPI_ISL_775917, EPI_ISL_775920, EPI_ISL_775951, EPI_ISL_775962, EPI_ISL_775984, EPI_ISL_775988, EPI_ISL_775991, EPI_ISL_775992, EPI_ISL_776193, EPI_ISL_776278, EPI_ISL_776447                                                                                 |                                                                                                                                                                                                 |                                                                                                                                        |                                                                                                                                                                                                                                                                                                                                                                                                                                                                                                                                                                                                                                                                                                                                                                       |
| see above                                                                                                                                                                                                                                                                                      | University Medical Center Hamburg Eppendorf                                                                                                                                                     | Heinrich Pette Institute, Leibniz Institute for Experimental Virology                                                                  | Adam Grundhoff; Alexis Robitaille; Johannes Knobloch; Martin Aepfelbacher; Nicole Fischer; Thomas Günther                                                                                                                                                                                                                                                                                                                                                                                                                                                                                                                                                                                                                                                             |
| EPI_ISL_767043, EPI_ISL_826284, EPI_ISL_826520                                                                                                                                                                                                                                                 | University of Bari Biomedical Sciences and Human Oncology                                                                                                                                       | University of Bari Biomedical Sciences and Human Oncology                                                                              | Accogli M.; Accogli Marisa; Anna Sallustio; Chironna M; Chironna Maria; Daniela Loconsole; Loconsole D.; Loconsole Daniela; Maria Chironna; Marisa Accogli; Sallustio A.; Sallustio Anna                                                                                                                                                                                                                                                                                                                                                                                                                                                                                                                                                                              |
| EPI_ISL_476078, EPI_ISL_477615, EPI_ISL_477616, EPI_ISL_477617, EPI_ISL_477618, EPI_ISL_477621, EPI_ISL_477624                                                                                                                                                                                 |                                                                                                                                                                                                 |                                                                                                                                        |                                                                                                                                                                                                                                                                                                                                                                                                                                                                                                                                                                                                                                                                                                                                                                       |
| see above                                                                                                                                                                                                                                                                                      | University of Szeged, Institute of Clinical Microbiology                                                                                                                                        | National Laboratory of Virology, Szentágotai Research Centre                                                                           | Balázs Somogyi; Brigitta Zana; Endre Gábor Tóth; Ferenc Jakab; Gábor Kemenesi; Terhes Gabriella                                                                                                                                                                                                                                                                                                                                                                                                                                                                                                                                                                                                                                                                       |
| EPI_ISL_424366                                                                                                                                                                                                                                                                                 | Vaccine Research, Development and Application Center, Erciyes University                                                                                                                        | Gen Era Diagnostics Inc.                                                                                                               | Alper Iseri; Aykut Ozdarendeli; Can Holyavkin; Günsu Aydın; Hazel Yetiskin; Muhammet Ali Uygut; Shaikh Terkis Islam Pavel; Zehra B Dursun; İlhami Celik                                                                                                                                                                                                                                                                                                                                                                                                                                                                                                                                                                                                               |
| EPI_ISL_644572                                                                                                                                                                                                                                                                                 | Veterinary Specialized Institute "Kraljevo", Serbia                                                                                                                                             | Veterinary Specialized Institute "Kraljevo", Serbia                                                                                    | Afonso, C.; Banovic Djeri, B.; Jankovic, M.; Jovanovic, T.; Knezevic, A.; Petrovic, T.; Sekler, M.; Tesovic, B.; Vidanovic, D.; Volkening, J.                                                                                                                                                                                                                                                                                                                                                                                                                                                                                                                                                                                                                         |
| EPI_ISL_678487, EPI_ISL_678488                                                                                                                                                                                                                                                                 | Veterinary Specialized Institute "Sabac", Serbia                                                                                                                                                | Veterinary Specialized Institute "Kraljevo", Serbia                                                                                    | Afonso, C.; Banovic Djeri, B.; Jankovic, M.; Jovanovic, T.; Knezevic, A.; Mrkovacki, S.; Petrovic, T.; Sekler, M.; Tesovic, B.; Vidanovic, D.; Volkening, J.                                                                                                                                                                                                                                                                                                                                                                                                                                                                                                                                                                                                          |
| EPI_ISL_455480                                                                                                                                                                                                                                                                                 | Veterinary Specialized Institute Kraljevo                                                                                                                                                       | Veterinary Specialized Institute Kraljevo                                                                                              | Banovic Djeri, B.; C.L.; Debeljak, Z.; Dmitric, M.; J. and Alfonso; Matovic, K.; Petrovic, T.; Sekler, M.; Tesovic, B.; Vaskovic, N.; Vidanovic, D.; Volkening                                                                                                                                                                                                                                                                                                                                                                                                                                                                                                                                                                                                        |
| EPI_ISL_833573                                                                                                                                                                                                                                                                                 | Veterinary Specialized Institute "Nis"                                                                                                                                                          | Veterinary Specialized Institute "Sabac", Serbia                                                                                       | Afonso, C.; Banovic Djeri, B.; Jankovic, M.; Jovanovic, T.; Knezevic, A.; Mrkovacki, S.; Petrovic, T.; Sekler, M.; Tesovic, B.; Vidanovic, D.; Volkening, J.; Vujinovic, S., .                                                                                                                                                                                                                                                                                                                                                                                                                                                                                                                                                                                        |
| EPI_ISL_451673, EPI_ISL_451676, EPI_ISL_451730, EPI_ISL_451740, EPI_ISL_451791, EPI_ISL_574879, EPI_ISL_574946, EPI_ISL_737654, EPI_ISL_737681, EPI_ISL_737848, EPI_ISL_767956, EPI_ISL_768225, EPI_ISL_796540                                                                                 |                                                                                                                                                                                                 |                                                                                                                                        |                                                                                                                                                                                                                                                                                                                                                                                                                                                                                                                                                                                                                                                                                                                                                                       |
| see above                                                                                                                                                                                                                                                                                      | Viollier AG                                                                                                                                                                                     | Department of Biosystems Science and Engineering, ETH Zürich                                                                           | Andrea Patrignani; Andreia Cabral de Gouvea; Catharine Aquino; Chaoaran Chen; Christian Beiselle; Christiane Beckmann; Christoph Noppen; David Dreifuss; Doris Popovic; Elodie Burcklen; Griffin White; Ina Nissen; Ivan Topolsky; Jay Tracy; Katharina Jahn; Lara Fuhrmann; Laura Neff; Lennart Opitz; Maria Domenica Moccia; Maurice Redondo; Natascha Santacrose; Niko Beerenwinkler; Noemie Santamaria de Souza; Olivier Kobel; Pedro Ferreira; Philipp Jablonski; Ralph Schlapbach; Sarah Nadeau; Simon Grüter; Sophie Seidel; Susana Posada-Céspedes; Tanja Stadler; Timothy Sykes; Tobias Schär                                                                                                                                                                |
| EPI_ISL_428926, EPI_ISL_428927, EPI_ISL_428928, EPI_ISL_428929                                                                                                                                                                                                                                 | ViroGenetics - BSL3 Laboratory of Virology; Human Genome Variation Research Group & Genomics Centre MCB; Bioinformatics Research Group; Wojewódzka Stacja Sanitarno-Epidemiologiczna w Krakowie | ViroGenetics - BSL3 Laboratory of Virology; Human Genome Variation Research Group & Genomics Centre MCB; Bioinformatics Research Group | Adrianna Klajmon; Agnieszka Starowicz; Aleksandra Pisarek; Aleksandra Synowiec; Danuta Piniowska-Róg; Ewelina Pośpiech; Inga Drebót; Jarosław Foremny; Kamila Marszałek; Katarzyna Dudek; Katarzyna Gula; Katarzyna Kopera; Krzysztof Pyrc; Magda Pachota; Marek Sanak; Michał Kowalski; Paweł P Łabaj; Tomasz Gromowski; Wojciech Branicki                                                                                                                                                                                                                                                                                                                                                                                                                           |
| EPI_ISL_418183, EPI_ISL_435403, EPI_ISL_435420, EPI_ISL_435421, EPI_ISL_435422, EPI_ISL_435423, EPI_ISL_435424, EPI_ISL_435425, EPI_ISL_435431                                                                                                                                                 |                                                                                                                                                                                                 |                                                                                                                                        |                                                                                                                                                                                                                                                                                                                                                                                                                                                                                                                                                                                                                                                                                                                                                                       |
| see above                                                                                                                                                                                                                                                                                      | Virological Research Group, Szentágotai Research Centre                                                                                                                                         | Bioinformatics Research Group, Szentágotai Research Centre                                                                             | Attila Gyenesi; Endre Gábor Tóth; Ferenc Jakab; Gábor Kemenesi; Péter Urbán; Róbert Herczeg                                                                                                                                                                                                                                                                                                                                                                                                                                                                                                                                                                                                                                                                           |

|                                                                                                                                                                                                                                                                                                                                                                                                                                                                                                                                                |                                                                               |                                                                                  |                                                                                              |
|------------------------------------------------------------------------------------------------------------------------------------------------------------------------------------------------------------------------------------------------------------------------------------------------------------------------------------------------------------------------------------------------------------------------------------------------------------------------------------------------------------------------------------------------|-------------------------------------------------------------------------------|----------------------------------------------------------------------------------|----------------------------------------------------------------------------------------------|
| EPI_ISL_416426                                                                                                                                                                                                                                                                                                                                                                                                                                                                                                                                 | Virological Research Group, Szentágotthai Research Centre, University of Pécs | Bioinformatics Research Group, Szentágotthai Research Centre, University of Pécs | Attila Gyenesei; Endre Gábor Tóth; Ferenc Jakab; Gábor Kemenesi; Péter Urbán; Róbert Herczeg |
| EPI_ISL_487759, EPI_ISL_487871, EPI_ISL_487887, EPI_ISL_487908, EPI_ISL_487923, EPI_ISL_487949, EPI_ISL_487961, EPI_ISL_487972, EPI_ISL_488920, EPI_ISL_488971, EPI_ISL_489035                                                                                                                                                                                                                                                                                                                                                                 | see above                                                                     | see above                                                                        | see above                                                                                    |
| EPI_ISL_425993, EPI_ISL_426002, EPI_ISL_426004, EPI_ISL_426006, EPI_ISL_433198, EPI_ISL_433216, EPI_ISL_449329, EPI_ISL_612341, EPI_ISL_705771, EPI_ISL_705772, EPI_ISL_705785, EPI_ISL_705795                                                                                                                                                                                                                                                                                                                                                 | see above                                                                     | see above                                                                        | see above                                                                                    |
| EPI_ISL_765207                                                                                                                                                                                                                                                                                                                                                                                                                                                                                                                                 | see above                                                                     | see above                                                                        | see above                                                                                    |
| EPI_ISL_417491                                                                                                                                                                                                                                                                                                                                                                                                                                                                                                                                 | see above                                                                     | see above                                                                        | see above                                                                                    |
| EPI_ISL_415710, EPI_ISL_427307, EPI_ISL_427319, EPI_ISL_427320, EPI_ISL_427321, EPI_ISL_427323, EPI_ISL_450242, EPI_ISL_450243, EPI_ISL_450252, EPI_ISL_507226, EPI_ISL_507253, EPI_ISL_733281                                                                                                                                                                                                                                                                                                                                                 | see above                                                                     | see above                                                                        | see above                                                                                    |
| EPI_ISL_418149, EPI_ISL_418159, EPI_ISL_420944, EPI_ISL_420969, EPI_ISL_420974, EPI_ISL_420976, EPI_ISL_420990, EPI_ISL_420994, EPI_ISL_422019, EPI_ISL_422045, EPI_ISL_422058, EPI_ISL_422091, EPI_ISL_422093, EPI_ISL_422108, EPI_ISL_422115, EPI_ISL_432301, EPI_ISL_445674, EPI_ISL_446270, EPI_ISL_446317                                                                                                                                                                                                                                 | see above                                                                     | see above                                                                        | see above                                                                                    |
| EPI_ISL_472913, EPI_ISL_706631, EPI_ISL_726429, EPI_ISL_814695, EPI_ISL_815248, EPI_ISL_452242                                                                                                                                                                                                                                                                                                                                                                                                                                                 | see above                                                                     | see above                                                                        | see above                                                                                    |
| EPI_ISL_425647, EPI_ISL_425657, EPI_ISL_425678, EPI_ISL_438892, EPI_ISL_448183, EPI_ISL_456874, EPI_ISL_473604, EPI_ISL_473659, EPI_ISL_473712, EPI_ISL_477976, EPI_ISL_478109, EPI_ISL_484533, EPI_ISL_526454, EPI_ISL_573787, EPI_ISL_594689, EPI_ISL_594711, EPI_ISL_627382, EPI_ISL_627402, EPI_ISL_651762, EPI_ISL_651835, EPI_ISL_651850, EPI_ISL_651864, EPI_ISL_651874, EPI_ISL_651887, EPI_ISL_651891, EPI_ISL_651953, EPI_ISL_705688, EPI_ISL_705705, EPI_ISL_814642, EPI_ISL_814659, EPI_ISL_838073, EPI_ISL_838132, EPI_ISL_838136 | see above                                                                     | see above                                                                        | see above                                                                                    |
| EPI_ISL_468135, EPI_ISL_468138, EPI_ISL_468139, EPI_ISL_468140, EPI_ISL_468141, EPI_ISL_468143, EPI_ISL_468144, EPI_ISL_468145, EPI_ISL_468146                                                                                                                                                                                                                                                                                                                                                                                                 | see above                                                                     | see above                                                                        | see above                                                                                    |
| EPI_ISL_424538, EPI_ISL_827554, EPI_ISL_830228                                                                                                                                                                                                                                                                                                                                                                                                                                                                                                 | see above                                                                     | see above                                                                        | see above                                                                                    |
| EPI_ISL_447635, EPI_ISL_447836                                                                                                                                                                                                                                                                                                                                                                                                                                                                                                                 | see above                                                                     | see above                                                                        | see above                                                                                    |
| EPI_ISL_462434, EPI_ISL_462435, EPI_ISL_462436, EPI_ISL_462437                                                                                                                                                                                                                                                                                                                                                                                                                                                                                 | see above                                                                     | see above                                                                        | see above                                                                                    |
